## Review Article

# Regulation of PI3K effector signalling in cancer by the phosphoinositide phosphatases

Samuel J. Rodgers, Daniel T. Ferguson, Christina A. Mitchell and Lisa M. Ooms

Cancer Program, Monash Biomedicine Discovery Institute and Department of Biochemistry and Molecular Biology, Monash University, Victoria 3800, Australia

**Correspondence:** Lisa Ooms (lisa.ooms@monash.edu)

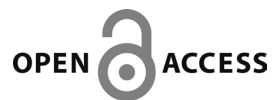

Class I phosphoinositide 3-kinase (PI3K) generates phosphatidylinositol 3,4,5-trisphosphate (PtdIns(3,4,5)P<sub>3</sub>) at the plasma membrane in response to growth factors, activating a signalling cascade that regulates many cellular functions including cell growth, proliferation, survival, migration and metabolism. The PI3K pathway is commonly dysregulated in human cancer, and drives tumorigenesis by promoting aberrant cell growth and transformation. PtdIns(3,4,5)P<sub>3</sub> facilitates the activation of many pleckstrin homology (PH) domain-containing proteins including the serine/threonine kinase AKT. There are three AKT isoforms that are frequently hyperactivated in cancer through mutation, amplification or dysregulation of upstream regulatory proteins. AKT isoforms have converging and opposing functions in tumorigenesis. PtdIns(3,4,5)P<sub>3</sub> signalling is degraded and terminated by phosphoinositide phosphatases such as phosphatase and tensin homologue (PTEN), proline-rich inositol polyphosphate 5-phosphatase (PIPP) (INPP5J) and inositol polyphosphate 4-phosphatase type II (INPP4B). PtdIns(3,4,5)P<sub>3</sub> is rapidly hydrolysed by PIPP to generate phosphatidylinositol 3,4-bisphosphate (PtdIns(3,4)P<sub>2</sub>), which is further hydrolysed by INPP4B to form phosphatidylinositol 3-phosphate (PtdIns3P). PtdIns(3,4)P<sub>2</sub> and PtdIns3P are also important signalling molecules; PtdIns(3,4)P<sub>2</sub> together with PtdIns(3,4,5)P<sub>3</sub> are required for maximal AKT activation and PtdIns3P activates PI3K-dependent serum and glucocorticoid-regulated kinase (SGK3) signalling. Loss of *Pten*, *Pipp* or *Inpp4b* expression or function promotes tumour growth in murine cancer models through enhanced AKT isoform-specific signalling. INPP4B inhibits PtdIns(3,4)P<sub>2</sub>-mediated AKT activation in breast and prostate cancer; however, INPP4B expression is increased in acute myeloid leukaemia (AML), melanoma and colon cancer where it paradoxically promotes cell proliferation, transformation and/or drug resistance. This review will discuss how PTEN, PIPP and INPP4B distinctly regulate PtdIns(3,4,5)P<sub>3</sub> signalling downstream of PI3K and how dysregulation of these phosphatases affects cancer outcomes.

## Introduction: the PI3K/AKT signalling pathway

The class I phosphoinositide 3-kinase (PI3K) signalling pathway is a dynamic regulator of physiological and cellular processes including cell proliferation, growth, survival, migration and metabolism. Hyperactivation of PI3K/AKT signalling frequently occurs in human cancers, thus making it an attractive therapeutic target. Class IA PI3Ks are heterodimeric enzymes consisting of a p110 $\alpha/\beta/\delta$  catalytic subunit and a p85 regulatory subunit and are directly activated by receptor tyrosine kinases (RTKs). Class IB PI3K heterodimers consist of a p110 $\gamma$  catalytic subunit and a p101 regulatory subunit and are activated downstream of G-protein-coupled receptors (GPCRs). *PIK3CA*, which encodes the p110 $\alpha$  subunit of class I PI3K, is frequently mutated or amplified in solid and haematological tumours [1,2]. Class IA or IB PI3Ks are activated upon extracellular stimulation of RTKs or GPCRs, and once activated phosphorylate the D3-position of the inositol ring of

Received: 28 September 2016  
Revised: 10 January 2017  
Accepted: 12 January 2017

Accepted Manuscript Online:  
12 January 2017  
Version of Record published:  
10 February 2017

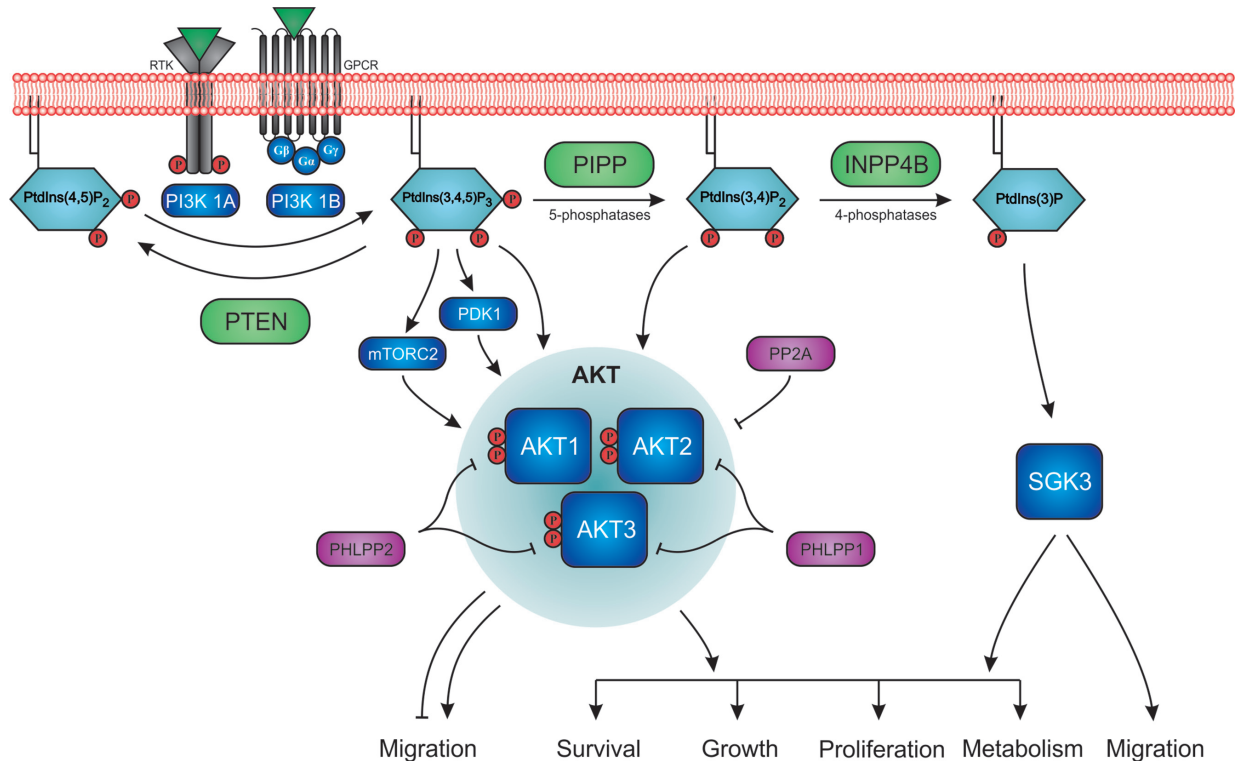

**Figure 1. Regulation of PtdIns(3,4,5)P<sub>3</sub> signalling by the phosphoinositide phosphatases**

Extracellular stimulation of RTKs or GPCRs leads to the recruitment and activation of PI3K1A or PI3K1B respectively, which in turn phosphorylate PtdIns(4,5)P<sub>2</sub> at the D5-position to transiently generate PtdIns(3,4,5)P<sub>3</sub> on the inner leaflet of the plasma membrane. PtdIns(3,4,5)P<sub>3</sub> binds several PH domain-containing proteins such as PDK1, mTORC2 and AKT isoforms (AKT1/2/3). PDK1 and mTORC1 phosphorylate AKT at two distinct phosphorylation sites (e.g. Thr<sup>308</sup> and Ser<sup>473</sup> of AKT1 respectively) that promotes its activation. Phosphorylated AKT is dephosphorylated by protein phosphatases PHLPP1/2 and PP2A, which inhibits its activity. PtdIns(3,4,5)P<sub>3</sub> is rapidly dephosphorylated by PTEN to form PtdIns(4,5)P<sub>2</sub>, terminating PI3K signalling. Alternatively, PtdIns(3,4,5)P<sub>3</sub> is also dephosphorylated by inositol polyphosphate 5-phosphatases (5-phosphatases) such as PIPP to generate PtdIns(3,4)P<sub>2</sub>, which is also required for maximal AKT activation. PtdIns(3,4)P<sub>2</sub> is hydrolysed by inositol polyphosphate 4-phosphatases (4-phosphatases) such as INPP4B to generate PtdIns3P, which facilitates phosphorylation and activation of SGK3. AKT and SGK3 activate a number of downstream signalling cascades that regulate cellular processes including cell growth, proliferation, survival, metabolism and migration.

phosphatidylinositol 4,5-bisphosphate (PtdIns(4,5)P<sub>2</sub>) to transiently generate a pool of phosphatidylinositol 3,4,5-trisphosphate (PtdIns(3,4,5)P<sub>3</sub>) at the plasma membrane (Figure 1). PtdIns(3,4,5)P<sub>3</sub> is rapidly dephosphorylated at the D5-position of the inositol ring by inositol polyphosphate 5-phosphatases producing phosphatidylinositol 3,4-bisphosphate (PtdIns(3,4)P<sub>2</sub>). Both PtdIns(3,4,5)P<sub>3</sub> and PtdIns(3,4)P<sub>2</sub> facilitate the plasma membrane recruitment of pleckstrin homology (PH)-domain containing proteins such as the serine/threonine kinase AKT [3-5]. Upon phosphoinositide binding, AKT is phosphorylated at Threonine-308 (Thr<sup>308</sup>) within the T-loop region of the catalytic domain by phosphoinositide-dependent kinase 1 (PDK1) and at Serine-473 (Ser<sup>473</sup>) in the C-terminal hydrophobic motif by mammalian target of rapamycin complex 2 (mTORC2), thereby promoting its kinase activity to phosphorylate a diverse spectrum of protein targets [5,6]. PI3K-dependent AKT signalling is inhibited by phosphatase and tensin homologue (PTEN), which hydrolyses PtdIns(3,4,5)P<sub>3</sub> at the D3-position phosphate of the inositol ring to form PtdIns(4,5)P<sub>2</sub> thus directly opposing PI3K. Alternatively, PtdIns(3,4,5)P<sub>3</sub> can be hydrolysed by inositol polyphosphate 5-phosphatases including proline-rich inositol polyphosphate 5-phosphatase (PIPP) to form PtdIns(3,4)P<sub>2</sub>, which in turn is degraded by inositol polyphosphate 4-phosphatases such as inositol polyphosphate 4-phosphatase type II (INPP4B) to generate phosphatidylinositol 3-phosphate (PtdIns3P), which also terminates PI3K/AKT signalling [7,8].

## AKT has three distinct isoforms

AKT has three highly homologous isoforms (AKT1, AKT2 and AKT3) expressed from distinct genes that are located on separate chromosomes. *AKT1* and *AKT2* transcripts are ubiquitously expressed in human tissues, but *AKT3* expression is more restricted with the highest levels detected in brain, testes, lungs and mammary tissues [9]. Isoform-specific *Akt* knockout mice display distinct physiological phenotypes such as reduced body weight (*Akt1*<sup>-/-</sup>), a diabetic-like phenotype (*Akt2*<sup>-/-</sup>) or impaired brain development (*Akt3*<sup>-/-</sup>) indicating that the three isoforms play non-redundant functional roles [10-15]. All three AKT isoforms contain both a T-loop (Thr<sup>308</sup>) and hydrophobic motif (Ser<sup>473</sup>) and are activated in a similar manner. Following AKT membrane recruitment, co-ordinated phosphorylation of these residues by protein kinases such as PDK1 and mTORC2 promotes AKT activation [5,6]. In fact, AKT is bound by the scaffolding protein IQGAP1 in a protein complex with class I PI3K, PDK1 and several other pathway effectors to facilitate rapid synthesis of PtdIns(3,4,5)P<sub>3</sub> and AKT activation [16]. However, whether the IQGAP1 complex mediates AKT isoform-specific activation remains to be determined. Previously, additional protein kinases have been shown to specifically phosphorylate Thr<sup>308</sup> or Ser<sup>473</sup> residues of AKT including DNA-dependent protein kinase (DNA-PK), integrin-linked kinase (ILK) and PI3K that may be implicated in isoform-specific activation [17-20]. Upon its activation, AKT phosphorylates numerous downstream targets including GSK3β, PRAS40, FOXO and p27 [7]. Although many effectors are phosphorylated by all three AKT isoforms, several isoform-specific substrates have also been identified such as palladin that is phosphorylated exclusively by AKT1 and regulates cytoskeletal remodelling [21]. Similarly, regulation of a number of AKT isoform-specific downstream effectors have been identified, including the degradation of nuclear factor of activated T cells (NFAT) mediated by AKT1 and up-regulation of β<sub>1</sub>-integrin by AKT2 that regulates breast cancer cell migration [22,23]. Although they have overlapping roles, there is emerging evidence that the distinct AKT isoforms have specific and sometimes paradoxical functions in cancer, which may be related to differences in their tissue expression, activation states, subcellular localization or substrates and downstream effectors.

## Alterations of AKT isoforms in cancer

There is evidence of AKT dysregulation in some cancers arising from mutations, amplification or hyperactivation of specific AKT isoforms. Somatic AKT mutations occur in up to 5% of human cancers and are clustered in the PH and kinase domains [24]. Although the consequences of most AKT mutations have not been functionally verified, a sporadic E17K hotspot mutation in the PH domain of AKT1 has been identified in breast, colorectal and ovarian cancers that promotes constitutive AKT1 recruitment to the plasma membrane [25]. AKT1<sup>E17K</sup> is associated with ER-positive breast cancers [26,27]. Patients with breast cancers bearing AKT1<sup>E17K</sup> mutations exhibit worse outcomes compared with patients with tumours expressing wild-type AKT1 [26]. Furthermore, 16% of AKT1-mutant tumours display no additional alterations involved in disease progression suggesting that AKT1<sup>E17K</sup> is a potent oncogenic driver [26]. Transgenic expression of AKT1<sup>E17K</sup> in murine mammary epithelial cells results in mammary hyperplasia and increased oestrogen receptor expression, although these mice do not develop malignant tumours even upon oestrogen exposure [28]. However, knockin of AKT1<sup>E17K</sup> in PIK3CA<sup>wild-type</sup> replete MCF-7 luminal breast cancer cells restores anchorage-independent cell growth and xenograft tumour growth comparable to parental MCF-7 PIK3CA<sup>E545K</sup> cells suggesting that AKT<sup>E17K</sup> is a *bona fide* oncogene [29]. An E17K mutation in AKT3 was also identified in one case of primary human melanoma, which may have similar functional consequences to AKT1, although this has not been functionally verified [30].

Genetic amplification of AKT isoforms is a relatively uncommon event in cancer. *AKT1* is occasionally amplified in human malignancies, including glioblastoma and a single case of human gastric adenocarcinoma [31,32]. *AKT2* is amplified in cancers such as ovarian (12.2%), breast (2.8%) and pancreatic cancers (10%) and its expression is elevated in pancreatic ductal adenocarcinomas and colorectal cancers [33-37]. *AKT3* is the most amplified isoform in a range of cancers including glioblastoma, melanoma, endometrial and breast cancers [38]. Up-regulation of *AKT3* mRNA and protein expression levels occurs in oestrogen receptor-negative breast cancers and androgen receptor-independent prostate cancer cells, and phosphorylated AKT3<sup>Ser473</sup> expression is increased in metastatic melanomas [39,40].

Hyperactivation of the PI3K/AKT pathway frequently results from dysregulation of the upstream regulatory proteins, rather than alterations in AKT itself. PDK1 phosphorylates the Thr<sup>308</sup> residue of AKT as well as other members of the AGC kinase family and is amplified in human breast cancers [41,42]. Phosphorylation of Thr<sup>308</sup> by PDK1 primes AKT for phosphorylation of its Ser<sup>473</sup> residue by mTORC2, which is a protein complex made up of the scaffolding protein mLST8, the catalytic subunit mTOR and regulatory proteins including DEP domain-containing

**Table 1 Divergent functions of AKT isoforms in mouse models of cancer**

|                   | AKT isoform expression | AKT1                 | AKT2                    | AKT3                       | References |
|-------------------|------------------------|----------------------|-------------------------|----------------------------|------------|
| Global knockout   | ↓ <sup>1</sup>         | Reduced body weight  | Diabetic-like phenotype | Impaired brain development | [10-12,15] |
| Tumour latency    | ↑ <sup>2</sup>         | Reduces (mammary)    | No effect (mammary)     | Not reported               | [64,65]    |
|                   | ↑ <sup>3</sup>         | Reduces (melanoma)   | Not reported            | Not reported               | [79]       |
|                   | ↓ <sup>1</sup>         | Increases (lung)     | Reduces (lung)          | Minimal effect (lung)      | [63]       |
|                   | ↓ <sup>4</sup>         | Reduces (hepatic)    |                         |                            | [66]       |
| Tumour incidence  | ↑ <sup>3</sup>         | No effect (glioma)   | Increases (glioma)      | Increases (glioma)         | [38]       |
|                   | ↓ <sup>1</sup>         | No effect (lung)     | Increase (lung)         | Minimal effect (lung)      | [63]       |
| Tumour metastasis | ↑ <sup>2</sup>         | Reduces (mammary)    | Increases (mammary)     | Not reported               | [64,65]    |
|                   | ↑ <sup>3</sup>         | Increases (melanoma) | Not reported            | Not reported               | [79]       |

<sup>1</sup>Global knockout. <sup>2</sup>Tissue-specific transgene. <sup>3</sup>RCAS-TVA system. <sup>4</sup>Hepatic *Akt1*<sup>-/-</sup> and global *Akt2*<sup>-/-</sup>.

mTOR-interacting protein (DEPTOR), Tti1/Tel2, RICTOR and mSin1 [43]. Overexpression of Rictor frequently occurs in human cancers, and *RICTOR* amplification has been identified in breast cancer, residual triple negative breast cancers following neoadjuvant therapy and lung adenocarcinomas with mTORC1/2-inhibitor susceptibility [44-46]. In addition, a D412G mutation in the PH domain of the mSin1 inhibitory subunit of mTORC2 was identified in ovarian cancer, which promotes constitutive mTORC2 activation [47].

More recently, additional protein kinases have been identified that hyperphosphorylate AKT at the Ser<sup>473</sup>/Thr<sup>308</sup> residues and promote AKT kinase activity in cancer. DNA-PK phosphorylates nuclear AKT at the Ser<sup>473</sup> region in response to DNA-damage in platinum-resistant ovarian cancer cells where it mediates chemoresistance [17]. In 3T3-L1-GLUT4myc adipocytes, PI3K (p110β/p85α) directly phosphorylates AKT1 at Ser<sup>473</sup>/Thr<sup>308</sup> and AKT2 residues at Ser<sup>474</sup> under insulin-stimulated conditions [18]. ILK in complex with RICTOR phosphorylates the Ser<sup>473</sup> residue of AKT in MDA-MB-231 and MDA-MB-468 breast cancer cells and PC3 prostate cancer cells, where it promotes cell survival and invasion independent of mTORC2 [19,20]. However, expression of murine *Ilk* with point mutations in the putative kinase domain reveals the *in vivo* kinase activity of ILK is dispensable for its function in normal mouse renal development, suggesting it instead serves as an adaptor protein rather than a direct AKT kinase [48]. Phosphorylation of the extreme C-terminal region (Ser<sup>477</sup>/Thr<sup>479</sup>) of AKT1 by CDK2/Cyclin A2 complex primes and promotes AKT1 Ser<sup>473</sup> phosphorylation, resulting in increased AKT-driven tumour growth *in vivo* [49]. In addition, post-translational modifications of AKT isoforms such as sumoylation or O-GlcNAcylation of AKT1, and ubiquitination of AKT1/2 are known to regulate AKT activation and may affect its function in cancer [50-52].

PI3K/AKT signalling may also be increased and sustained in some human cancers due to dysregulation of the protein and lipid phosphatases that modulate the PI3K/AKT signalling pathway (Figure 2). Protein phosphatase 2 (PP2A) complex and PH domain and leucine-rich repeat protein phosphatases 1 and 2 (PHLPP1/2) directly dephosphorylate AKT, thus opposing its phosphorylation-dependent activation (reviewed in [53,54]). PHLPP2 specifically dephosphorylates the hydrophobic Ser<sup>473/472</sup> motif of AKT1 and AKT3, whereas PHLPP1 dephosphorylates the Ser<sup>474/472</sup> motif of AKT2 and AKT3 [55,56]. PHLPP1/2 expression is frequently decreased in human cancers such as colon, breast, ovarian, prostate and hepatocellular carcinoma (HCC) [54]. Loss of heterozygosity (LOH) of the chromosomal region (18q21.33) to which PHLPP1 maps occurs in colon cancers, and LOH of the PHLPP2 locus (16q22.3) is observed in HCCs, Wilms' tumours and breast, ovarian and prostate cancers [57-62]. The subunits of PP2A (e.g. PR65/A, B56) also show decreased expression in cancers such as melanoma, acute myeloid leukaemia (AML), breast cancer and colorectal cancer [53]. In addition, the spatio-temporal regulation of PtdIns(3,4,5)P<sub>3</sub> and PtdIns(3,4)P<sub>2</sub> is essential for recruiting AKT to the plasma membrane to be phosphorylated by protein kinases. The phosphoinositide phosphatases such as PTEN, PIPP and INPP4B dynamically regulate PtdIns(3,4,5)P<sub>3</sub> and PtdIns(3,4)P<sub>2</sub> levels, and play prominent roles in human cancers and their function will be further discussed below. Thus, the PI3K/AKT pathway is a complex network of proteins and phosphoinositides that can be altered at many different points leading to dysregulation of the signalling axis.

## Divergent functions of AKT isoforms in cancer

AKT is considered a *bona fide* oncogene in human cancers, yet disruption of individual AKT isoforms reveals distinct and opposing roles in tumorigenesis (Table 1). *Akt1* or *Akt2* knockout in a viral oncogene-induced mouse model

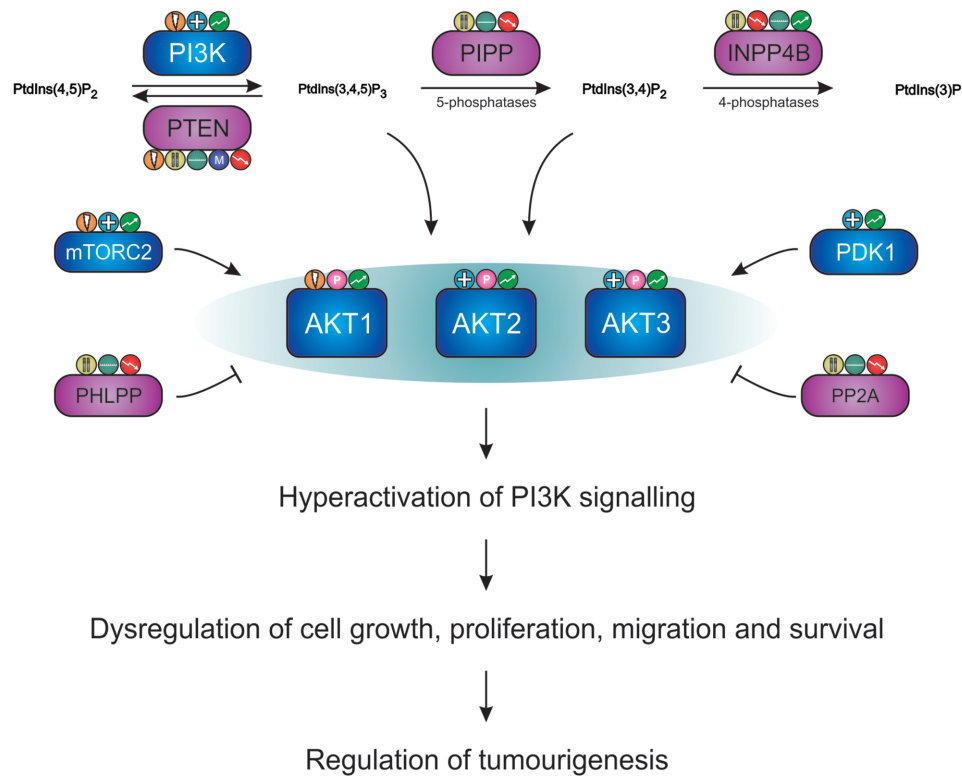

#### Frequent aberrations of the PI3K pathway

- |                                                                                     |                                |                                                                                     |                                                  |
|-------------------------------------------------------------------------------------|--------------------------------|-------------------------------------------------------------------------------------|--------------------------------------------------|
|  | Functionally-verified mutation |  | Loss of heterozygosity of the chromosomal region |
|  | Gene amplification             |  | Downregulation of expression by miRNA            |
|  | Hyperphosphorylation           |  | Promoter methylation                             |
|  | Increased expression           |  | Decreased expression                             |

#### Figure 2. Dysregulation of the PI3K/AKT signalling pathway promotes AKT hyperactivation and tumorigenesis

Hyperactivation of PI3K/AKT signalling commonly occurs following dysregulation of the PI3K pathway regulatory proteins including PI3K, AKT, mTORC2, PDK1, PTEN, PIPP, INPP4B, PHLPP and PP2A. Aberration in the function of these proteins can result from mutations, gene amplification, promoter methylation, hyperphosphorylation, LOH, down-regulation by miRNAs or changes in protein and mRNA expression. This leads to disruption of downstream pathway effectors that regulate cell growth, proliferation, migration and survival.

of lung cancer demonstrated that *Akt1*-ablation inhibited, whereas *Akt2*-ablation enhanced lung tumour initiation, highlighting their functionally diverse roles [63]. In a similar manner, transgenic expression of AKT1 accelerates the tumour incidence of *PyMT* mammary tumour mice, while AKT2 transgenic expression had no effect on tumour latency [64]. However, transgenic mammary expression of AKT1 or AKT2 alone in wild-type mice is insufficient to promote *de novo* tumour formation [64,65]. In contrast, hepatic *Akt1* knockout in an *Akt2*-null murine model triggers a FOXO-dependent inflammatory response leading to spontaneous HCC, which was not observed with hepatic knockout of *Akt1* or *Akt2* alone, suggesting a novel co-operative and potentially tumour-suppressive effect of AKT1/2 in hepatic tissue [66]. In triple negative breast cancers, increased AKT3 expression is prevalent and may be driven by gene amplification [67,68]. shRNA-mediated knockdown of *AKT1*, *AKT2* or *AKT3* in triple negative breast cancer cells revealed that AKT3 is preferentially required for 3D tumour spheroid growth and *in vivo* xenograft tumour growth through regulation of the cell-cycle inhibitor p27, whereas knockdown of *AKT1* and *AKT2* had little effect on tumour growth [67]. Furthermore, AKT3 depletion sensitizes triple negative breast cancer cells to the pan-AKT inhibitor GSK690693 [67]. Similarly, AKT3 is up-regulated in T47D luminal breast cancer cells in response to the AKT inhibitor MK2206 that confers resistance to MK2206, and *AKT3* depletion in these cells selectively increases

sensitivity to MK2206 treatment whereas *AKT1* or *AKT2* depletion has no effect [69]. *AKT3* mRNA and protein expression is also increased in prostate tumours, and overexpression of *AKT3* promotes cell proliferation in a range of prostate cancer cell lines [70].

The phenotype of *Akt3* knockout mice indicates that *AKT3* function is critical in brain tissue, thus, perhaps not surprisingly, *AKT3* plays a significant role in human gliomas. In primary murine astrocytes with mutant *PTEN/p53/EGFR* alleles, *Akt3*-ablation specifically inhibited anchorage-independent cell growth while *Akt1*- or *Akt2*-ablation had no effect [71]. Similarly in a PDGFB-driven mouse model of low-grade glioma, transgenic expression of *AKT2* or *AKT3* but not *AKT1* greatly accelerated tumour formation [38]. Strikingly, RNA microarray analysis revealed that transgenic *AKT3* expression enriches expression of genes associated with DNA damage response, which mediates DNA repair and resistance to radiotherapy and chemotherapy treatments suggesting that increased *AKT3* expression may promote malignancy [38]. However, in a separate study, *AKT3* overexpression reduced cell-cycle progression and cell survival in human glioblastoma cell lines, and increased the tumour survival of mice with orthotopic injection of glioblastoma cells [72]. Furthermore, increased *AKT3* mRNA levels were associated with increased patient survival and lower grade glioblastomas suggesting a more favourable outcome for these patients, whereas *AKT1* and *AKT2* expression was increased in higher grade tumours [72].

In addition to their divergent functions in tumour growth and maintenance, *AKT* isoforms have distinct functions in regulating cell migration and cancer metastasis that are highly context and cell-type specific. Transgenic overexpression of constitutively active *AKT1* and *AKT2* in oncogene-driven mouse models of breast cancer have revealed their opposing effects on cell migration and tumour metastasis, whereby *AKT1* inhibits but *AKT2* promotes the establishment of metastatic lesions [64,65,73]. *In vitro* studies in breast cancer cell lines suggest that *AKT1*-mediated degradation of the pro-invasion transcription factor NFAT and the tumour-suppressor tuberous sclerosis complex 2 (*TSC2*) decreases, whereas *AKT2*-mediated up-regulation of pro-invasive  $\beta$ 1-integrin promotes cell migration [22,23,74]. In addition, the actin-bundling protein palladin is specifically phosphorylated at Ser<sup>507</sup> and activated by *AKT1* leading to an inhibition of cell migration mediated via cytoskeletal remodelling [75]. In contrast, *AKT2* promotes palladin stability and mRNA up-regulation via unknown mechanisms [76]. Phosphorylation of Rho-GTPase by *AKT1* in inflammatory breast cancer cells is critical for promoting caveolin-1-mediated migration suggesting that *AKT1* conversely promotes migration in this cellular context [77].

In PC-3 prostate cancer cells, siRNA-mediated knockdown of *AKT1* inhibited cell migration and cell adhesion, whereas *AKT2* knockdown promoted cell migration suggesting that *AKT1* has a pro- and *AKT2* has an antimigratory role in prostate cancer, in contrast with their functions in breast cancer [78]. Similarly, transgenic expression of constitutively active *AKT1* in *BRAF*<sup>V600E</sup>/*Cdkn2a*<sup>Null</sup> non-metastatic melanoma model mice induces metastatic lesions in the brain and lung [79]. In MDA-MB-231 and MCF-7-Ras breast cancer cells, which have more stem-like properties, *AKT1* inhibition has a more prominent effect than *AKT2* inhibition in reducing the cancer cell stem phenotype, as reflected by reduced mesenchymal-epithelial transition (*MET*) and expression of epithelial-like markers [80]. As epithelial–mesenchymal transition (*EMT*) is a critical process in metastatic invasion, *AKT1* induction of stem properties may confer an increase in invasive and metastatic potential of stem-like tumour cells. Interestingly, *Akt3*-ablation in mutant *PTEN/p53/EGFR* murine astrocytes inhibited cell migration whereas *Akt1* and *Akt2* ablation had no effect [71]. However, in vascular tumour cells *AKT3* depletion increases whereas *AKT1* depletion decreases sprouting angiogenesis and wound healing capacity, suggesting that *AKT3* conversely inhibits vascular tumour growth and migration [81].

*AKT* displays a range of isoform-specific functions in different tissues, yet the explanation for such a divergence in functions is poorly understood. These distinct functions are likely to be highly context-specific and affected in part by expression levels, subcellular localization and/or the unique interactome of the different isoforms. Other kinase families such as the protein kinase C (*PKC*) isozymes have overlapping and opposing functions in human cancers similar to *AKT*, suggesting that divergent kinase functions are likely to mediate a homeostatic balance of cellular pathways that are often exploited in human malignancies [82]. As clinical trials with pan-*AKT* inhibitors have shown limited success in cancer treatment this far, perhaps a greater understanding of the isoform-specific effects of *AKT* may assist in the development of more targeted *AKT* isoform therapeutic strategies. Moreover, increasing our understanding of *AKT* regulatory enzymes, particularly the phosphoinositide phosphatases, may elucidate additional contributing factors for isoform-specific signalling. The inositol polyphosphate phosphatases including *PTEN*, *PIPP* and *INPP4B* regulate *PtdIns(3,4,5)P<sub>3</sub>* and *PtdIns(3,4)P<sub>2</sub>* levels and thus modulate *AKT* activation. These lipid phosphatases were initially predicted to be tumour suppressors whereby loss of expression would increase *PI3K/AKT* signalling and tumour growth and progression thereby leading to a worse prognosis. However, this review will discuss their roles in regulating isoform-specific *AKT* functions, and their potential to play highly dynamic and complex roles in cancer biology beyond a conventional tumour suppressor function.

# Regulation of PtdIns(3,4,5)P<sub>3</sub> signalling by phosphoinositide phosphatases

## PTEN

PTEN is a well-established tumour suppressor and its function is lost in a wide spectrum of human cancers via multiple mechanisms including sporadic mutations, deletions, transcriptional silencing, protein instability or subcellular mislocalization (reviewed in [83,84]). *PTEN* is one of the most frequently mutated and down-regulated tumour suppressive genes in human cancer [83]. Single germ line mutations in *PTEN* are sufficient to predispose individuals to PTEN hamartoma tumour syndromes (PHTS) that result in tumour-like lesions throughout the body and an increased risk of developing malignant tumours [85]. *Pten*<sup>-/-</sup> mice die embryonically, but *Pten* haploinsufficient mice in part recapitulate PTEN-deficient human cancers, and exhibit widespread neoplasia and hyperplasia in multiple tissues [86-88]. Functionally, PTEN is a dual specificity protein phosphatase that dephosphorylates p-tyrosine, -serine and -threonine residues as well as a lipid phosphatase that hydrolyses the D3-position phosphate from the inositol head group of PtdIns(3,4,5)P<sub>3</sub>. PTEN's tumour suppressor function was first characterized via its phosphoinositide phosphatase activity, whereby hydrolysis of PtdIns(3,4,5)P<sub>3</sub> by PTEN directly opposes PI3K signalling activity [89-91]. Thus, PTEN loss drives PI3K/AKT hyperactivation. The phosphoprotein phosphatase function of PTEN has been linked to cancer signalling via dephosphorylation of protein targets such as focal adhesion kinase (FAK), insulin receptor substrate 1 (IRS-1), c-SRC or PTEN itself, all of which regulate tumorigenesis [92-95]. However, studies *in vitro* and *in vivo* have confirmed that PTEN phosphoinositide phosphatase activity plays a more predominant tumour suppressor role than the phosphoprotein activity [96,97]. For example, mice with single allele knockin of either the catalytically inactive (C124S) mutant lacking both protein and lipid phosphatase activity or a lipid phosphatase inactive (G129E) PTEN mutant, display similar tumour spectra to each other, but show accelerated tumorigenesis compared with *Pten*<sup>+/-</sup> mice [97]. PTEN mutant proteins heterodimerize with wild-type PTEN protein thereby disrupting PTEN function in a dominant negative manner [97]. Critically, AKT hyperactivation resulting from loss of PTEN lipid phosphatase function is the prominent oncogenic driving force in PTEN-deficient cancers.

The molecular mechanisms by which specific AKT isoforms mediate tumorigenesis downstream of PTEN-loss have not been well characterized. Initial reports suggested a prominent role for AKT1 in PTEN-deficient cancers. Strikingly, *Akt1* ablation in *Pten*<sup>+/-</sup> mice prevented the onset of neoplasia in endometrial, prostate and thyroid tissues, and reduced the incidence of intestinal polyps and high-grade neoplastic lesions in the adrenal medulla (Table 2) [98]. Conversely, knockout of *Akt2* in *Pten*<sup>+/-</sup> mice had no significant effects on neoplastic growth in most tissues except the thyroid gland, where the inhibition of neoplastic incidence was comparable to *Akt1*<sup>-/-</sup>; *Pten*<sup>+/-</sup> mice (Table 2) [99]. Examination of the relative expression of *AKT1* and *AKT2* in these murine tissues revealed that the thyroid gland was the only tissue where *AKT2* expression was higher than that of *AKT1*, suggesting a model whereby the onset of PTEN-deficient cancer is preferentially driven by *AKT1*, except in tissues where *AKT2*-enrichment is sufficient to co-operatively drive neoplasia.

However, other findings challenge the dispensability of *AKT2* in the progression of *PTEN*-deficient solid tumours including prostate and breast cancer and glioblastoma [100]. Inducible shRNA knockdown of *AKT1* or *AKT2* in *PTEN*-deficient prostate cancer cells inhibited the formation of 3D spheroids, suggesting that both *AKT* isoforms may be required for initial tumour growth. In contrast, induction of *AKT2* but not *AKT1* silencing after 1 week caused widespread apoptosis and compromised cell morphology leading to complete disruption of spheroid architecture, which was recapitulated upon treatment of spheroids with an *AKT2*-specific inhibitor, suggesting that *AKT2* plays a dominant role in 3D tumour survival and progression (Table 2) [100]. *AKT2* silencing had a similar effect on *PTEN*-deficient breast cancer and glioblastoma cell models, whereby *AKT2* knockdown caused regression of 3D spheroid growth comparable to prostate cancer models (Table 2) [100]. Importantly, induction of *AKT1* knockdown slowed xenograft tumour growth, whereas *AKT2* knockdown resulted in a striking regression of tumour size suggesting decreased tumour survival capacity [100]. The co-operativity between *AKT2* and *PTEN*-deficiency was further demonstrated in colon cancer, where loss of *PTEN* function was required for enhanced liver metastasis of intrasplenically injected colorectal cancer cells overexpressing *AKT2* (Table 2) [101]. These studies highlight the differential yet indispensable roles of *AKT1* and *AKT2* in *PTEN*-deficient cancer development, suggesting that *AKT1* may drive the initial establishment of solid tumours whereas *AKT2* may be intrinsic to tumour maintenance and survival.

## PIPP

PIPP (INPP5J, Pib5pa, PtdIns(4,5)P<sub>2</sub> 5-phosphatase A) has recently been demonstrated to act as a putative tumour suppressor in breast cancer and also as a regulator of *AKT1*-dependent breast cancer metastasis. PIPP is one of the ten mammalian inositol polyphosphate 5-phosphatases that hydrolyses the D5-position phosphate from the inositol ring

**Table 2 PI3K signalling effector regulation following dysregulation of PTEN, PIPP or INPP4B in melanoma, breast, prostate, thyroid and colorectal cancers**

| Cancer type       | PTEN                                                                                                                                                                                                                               | PIPP                                                                                                                       | INPP4B (tumour suppressor function)                                                                                           | INPP4B (oncogenic function)                                                                                          |
|-------------------|------------------------------------------------------------------------------------------------------------------------------------------------------------------------------------------------------------------------------------|----------------------------------------------------------------------------------------------------------------------------|-------------------------------------------------------------------------------------------------------------------------------|----------------------------------------------------------------------------------------------------------------------|
| Breast cancer     | <b>AKT2</b><br>Knockdown of <i>AKT2</i> in <i>PTEN</i> -deficient breast cancer cells reduces 3D spheroid growth [100].                                                                                                            | <b>AKT1</b><br>Knockdown of <i>AKT1</i> rescues cell migration defect in <i>PIPP</i> -deficient breast cancer cells [105]. | <b>AKT</b><br><i>INPP4B</i> knockdown promotes AKT-mediated breast cancer cell growth and proliferation [121,129].            | <b>SGK3</b><br><i>INPP4B</i> knockdown reduces SGK3-mediated cell growth and proliferation [144].                    |
| Melanoma          | <b>AKT</b><br><i>PTEN</i> knockdown in melanocytes enhances AKT-mediated cell growth [107].                                                                                                                                        | <b>AKT</b><br><i>PIPP</i> overexpression in melanoma cells reduces AKT-mediated cell proliferation and survival [107].     | <b>AKT</b><br><i>INPP4B</i> knockdown promotes AKT-mediated melanoma cell growth and proliferation [133].                     | <b>SGK3</b><br><i>INPP4B</i> overexpression promotes SGK3-mediated cell growth and proliferation [143].              |
| Prostate cancer   | <b>AKT1/AKT2</b><br><i>Akt1</i> ablation prevents prostate tumour onset in <i>Pten</i> <sup>+/-</sup> mice [98].<br><br>Knockdown of <i>AKT2</i> in <i>PTEN</i> -deficient prostate cancer cells reduces 3D spheroid growth [100]. | Not reported.                                                                                                              | <b>AKT</b><br><i>INPP4B</i> knockdown promotes AKT-mediated prostate cancer cell growth and proliferation [130].              | Not reported.                                                                                                        |
| Thyroid cancer    | <b>AKT1/AKT2</b><br><i>Akt1</i> or <i>Akt2</i> ablation prevents thyroid tumour onset in <i>Pten</i> <sup>+/-</sup> mice [98].                                                                                                     | Not reported.                                                                                                              | <b>AKT2</b><br><i>Inpp4b</i> ablation in <i>Pten</i> <sup>+/-</sup> mice promotes AKT2-dependent thyroid tumour growth [126]. | Not reported.                                                                                                        |
| Colorectal cancer | <b>AKT2</b><br>PTEN loss is required for metastasis of colorectal cancer cells overexpressing <i>AKT2</i> [101].                                                                                                                   | Not reported.                                                                                                              | Not reported.                                                                                                                 | <b>AKT/SGK3</b><br><i>INPP4B</i> overexpression promotes AKT- and SGK3-mediated cell growth and proliferation [128]. |

of PtdIns(4,5)P<sub>2</sub>, PtdIns(3,4,5)P<sub>3</sub>, inositol-1,4,5-trisphosphate (Ins(1,4,5)P<sub>3</sub>) and inositol-1,3,4,5-tetrakisphosphate (Ins(1,3,4,5)P<sub>4</sub>) [102,103]. In addition to the conserved 5-phosphatase domain, PIPP also contains N- and C-terminal proline-rich domains containing six RXXSXP 14–3-3 ζ-binding motifs and a SKICH domain C-terminal to the 5-phosphatase domain, which mediates its constitutive localization to the plasma membrane in quiescent and epidermal growth factor (EGF)-stimulated cells [104]. Although both PtdIns(3,4,5)P<sub>3</sub> and PtdIns(3,4)P<sub>2</sub> are required for maximal AKT activation, a number of studies have revealed that PIPP regulates AKT activation and consequently the phosphorylation of downstream effectors including GSK3β, PRAS40, 4E-BP1 and p70 S6 kinase [105–107]. Murine knockout of *Pipp* in all tissues results in no overt phenotype at 4 months of age and does not lead to *de novo* tumour formation [105]. However, *Pipp* ablation in an MMTV-*PyMT* mouse model of breast cancer promotes mammary tumour initiation and growth resulting in larger tumours compared with mice expressing *Pipp*. *PyMT*;*Pipp*<sup>-/-</sup> mice also exhibit increased AKT<sup>Ser473</sup> phosphorylation in both hyperplastic foci and primary mammary tumours suggesting that *Pipp* loss enhances oncogene-driven breast cancer initiation and progression via regulating PI3K/AKT signalling.

Paradoxically, despite promoting the formation of larger mammary tumours, *Pipp* ablation in the *PyMT* mouse model resulted in reduced numbers of lung metastases [105]. Moreover, *Pipp*-deficient mammary cancer cells exhibited reduced cell migration and invasion *in vitro*, a defect rescued by the shRNA-mediated knockdown of *Akt1* but not *Akt2* (Table 1) [105]. This is consistent with the established role for AKT1 in inhibiting and AKT2 in promoting breast cancer cell migration and metastasis [22,108]. There is no evidence that loss of *Pipp* results in differential AKT isoform activation [105]. *AKT1* mRNA is the major isoform expressed in murine mammary tumour cells. However, AKT1 and AKT2 are equally expressed in a number of ER-negative human breast cancer cell lines including MDA-MB-231 cells in which *PIPP* shRNA knockdown also reduced cell migration and expression of AKT1 downstream targets suggesting that the impaired migration is not simply due to differences in AKT isoform levels [105,109]. Alternatively, PIPP regulation of AKT1-dependent cell migration may reflect differences in AKT isoform subcellular localization. AKT1 localizes to the cytoplasm in a number of human breast cancer cell lines, whereas AKT2 is present in mitochondria and the cytoplasm and AKT3 exhibits a nuclear and nuclear membrane distribution [109]. Further studies are required to fully elucidate the complex molecular mechanisms by which phosphoinositide signalling regulates AKT isoform-specific cell migration and metastasis.



*PIPP* is reported to be one of the ten highest ranked genes for predicting outcomes in human breast cancer and therefore understanding its exact role in regulating mammary tumorigenesis and metastasis is of particular importance [110]. The *INPP5J* gene is located on chromosome 22q12 and allelic loss of this region occurs in ~30% of breast cancers [111–113]. Furthermore, reduced *PIPP* copy number has been reported in 15–20% of primary melanomas and melanoma cell lines, and *PIPP* expression is epigenetically suppressed by HDAC2 and -3-mediated histone hypoacetylation in melanoma cell lines [107]. Higher *PIPP* expression in breast cancer correlates with a better prognosis, defined as no development of distant metastases within 5 years of diagnosis, whereas lower *PIPP* mRNA expression predicts for reduced relapse-free and overall survival [105,114]. However, this decrease in survival does not appear to be consistent with the observation that *Pipp* ablation reduces mammary carcinoma metastasis in MMTV-*PyMT* mice [105]. There are several possible explanations for this apparent paradox. Firstly, although *Pipp* loss significantly reduces mammary carcinoma metastasis, all mice still develop lung metastases in this particular oncogene-driven murine model [105]. As *Pipp* ablation promotes cell proliferation, metastatic *PIPP*-deficient cells may have a proliferative advantage and facilitate secondary tumour establishment and growth at distant sites. Secondly, *PIPP* regulates cell migration in an AKT1-dependent manner. Expression of both *PIPP* and *AKT1* was reduced in a subset of human breast cancers and it is interesting to speculate that hyperactivated AKT2 in these tumours may promote metastasis leading to a poorer outcome [105] although this has yet to be shown.

Studies in melanoma cell lines and xenografts have revealed that *PIPP* also acts as a potential tumour suppressor in melanoma. Transient overexpression of *PIPP* resulted in decreased proliferation, survival and AKT activation in melanoma cell lines (Table 2) [107]. Additionally, overexpression of *PIPP* in the ME1007 melanoma cell line resulted in reduced xenograft tumour growth [107]. Accordingly, shRNA knockdown of *PIPP* promoted anchorage-independent cell growth of cultured melanocytes [107], similar to the results observed with *PIPP* shRNA in breast cancer cell lines [105]. However, overexpression of *PIPP* in the MEL-FH melanoma cell line decreased cell migration [115]. Interestingly, expression of constitutively active AKT1 promoted metastasis in a murine melanoma model [79] in contrast with the reduced metastasis observed in murine mammary cancer models [64,65,73]. Although the effects of *PIPP* loss on melanoma cell migration and metastasis have not been reported, it is interesting to speculate that this may lead to increased cell migration and metastasis via AKT1 activation.

AKT1 exhibits a cell type-specific role in regulating cell migration in different cancer cells. Knockdown of *AKT1* decreases cell migration in lung and ovarian cancer cells [116,117] but increases cell migration in endometrial and breast cancer cells [105,118]. Conversely, expression of constitutively active AKT1 impairs breast cancer cell migration [22,23,75] but promotes invasion of pancreatic carcinoma and fibrosarcoma cells [119,120]. Therefore, it will be interesting to explore the effects of *PIPP* loss on tumour cell invasion and metastasis in other cancers.

Interestingly, *PIPP* expression positively correlates with *PTEN* expression in primary human melanomas, with ~35% of *PTEN*-null melanomas exhibiting *PIPP* deficiency [107]. Co-expression of exogenous *PIPP* and *PTEN* in a melanoma cell line further decreased pAKT<sup>Ser473</sup> compared with either phosphatase alone [107]. Conversely, knockdown of both *PIPP* and *PTEN* resulted in increased AKT phosphorylation compared with knockdown of either phosphatase alone suggesting that combined loss of *PIPP* and *PTEN* may additively hyperactivate PI3K/AKT signalling in melanoma cells [107], consistent with the contention that *PIPP* and *PTEN* play non-redundant roles in regulating PtdIns(3,4,5) $P_3$ -dependent signalling. However, knockdown of both *PIPP* and *PTEN* may trigger senescence in cultured melanocytes under anchorage-independent conditions, although a proportion of double knockdown cells may evade senescence and form significantly larger colonies [107]. A similar phenotype was observed in human mammary epithelial cells with shRNA knockdown of both *PTEN* and the inositol polyphosphate 4-phosphatase *INPP4B* [121].

## INPP4B

INPP4B together with INPP4A are members of the mammalian inositol polyphosphate 4-phosphatase family. INPP4A and INPP4B share 37% sequence homology and contain an N-terminal C2 domain(s), a PEST sequence and an N-terminal dual specificity 4-phosphatase domain [122,123]. INPP4B preferentially displays catalytic activity towards PtdIns(3,4) $P_2$ , but hydrolyses several other lipid species *in vitro* including PtdIns(4,5) $P_2$ , PtdIns(3,4,5) $P_3$ , inositol-1,3,4-trisphosphate (Ins(1,3,4) $P_3$ ) and Ins(3,4) $P_2$  [121,124–126]. Additionally, INPP4B displays intrinsic p-tyrosine, -serine and -threonine phosphatase activity [127,128]. INPP4B was characterized as an inositol polyphosphate 4-phosphatase that preferentially dephosphorylates plasma membrane-bound PtdIns(3,4) $P_2$  at the D4-position of the inositol ring to form PtdIns3P [121,124,125]. As both PtdIns(3,4) $P_2$  and PtdIns(3,4,5) $P_3$  are required for AKT recruitment to the plasma membrane and maximal AKT activation, INPP4B was predicted to act as a tumour suppressor by inhibiting PI3K/AKT signalling. Indeed, INPP4B tumour suppressor function was initially identified in breast

cancer. *INPP4B* mRNA expression is lost in a cohort of basal-like breast cancers and its reduced expression is associated with higher tumour grade and worse survival [121,129]. LOH of the gene region of *INPP4B*(4q31.21) occurs in basal-like breast tumours (55.6%), ovarian cancers (39.8%) and melanomas (21.6%) [121]. *INPP4B* shRNA knockdown in breast cancer cell lines increased cell proliferation, motility, anchorage-independent cell growth, xenograft tumour growth and disrupted mammary acini morphology in an AKT-dependent manner (Table 2) [121,129]. Interestingly, *INPP4B* protein expression is frequently lost in primary human PTEN-null breast tumours [129], and *PTEN* depletion in mammary epithelial cells phenocopies the changes in cell proliferation, motility and AKT activation following *INPP4B* depletion [121]. However concomitant shRNA-mediated knockdown of *INPP4B* and *PTEN* decreased cell proliferation and anchorage-independent cell growth compared with control cells, and increased cellular senescence which was rescued upon shRNA knockdown of *p53* [121]. Colonies that formed under anchorage-independent cell growth conditions in *INPP4B/PTEN* knockdown cells were larger than *INPP4B* or *PTEN* single knockdown colonies, suggesting that depletion of both *INPP4B* and *PTEN* can enhance cell growth in rare events in a manner similar to dual *PTEN/PIPP* knockdown in melanoma cell lines [107,121].

In addition, examination of *INPP4B* function in prostate cancer has supported its role as a tumour suppressor. Loss of *INPP4B* expression in prostate cancers is associated with reduced time for biochemical recurrence and poorer outcomes [130,131]. *INPP4B* shRNA knockdown in LNCaP prostate cancer cell lines increased cell proliferation and AKT activation, whereas its ectopic expression in PC-3 prostate cancer cells decreased *in vivo* stromal invasion in chick-embryo models (Table 2) [130,132]. Similarly, *INPP4B* protein expression is progressively lost in more advanced stages of human melanocytic tumours, and its shRNA-mediated knockdown in melanoma cell lines enhanced AKT<sup>Ser473</sup> phosphorylation, proliferation, migration and *in vivo* tumour growth [133]. Collectively, these findings support a model whereby *INPP4B* functions as a tumour suppressor by negatively regulating PtdIns(3,4) $P_2$ -dependent AKT signalling.

*In vivo* depletion of *Inpp4b* in mice is not sufficient to drive spontaneous tumorigenesis *per se* as *Inpp4b*<sup>-/-</sup> mice are viable with a normal lifespan and no evidence of tumour development up to 2 years of age, although mice exhibit decreased bone mass and osteoporosis from 8 weeks of age [125,126,134]. This is in contrast with *Pten*<sup>+/-</sup> mice that develop hyperplasia and in turn cancer in multiple organs from an early age [86, 87, 88]. Expression of both *INPP4B* and *PTEN* is frequently lost in thyroid and endometrial cancers, suggesting a co-operative tumour suppressor function for both enzymes. Consequently, *Inpp4b*<sup>-/-</sup> mice were crossed with *Pten*<sup>+/-</sup> mice to examine the co-operative tumour suppressor function of *INPP4B* in the context of *PTEN* haploinsufficiency. Strikingly, *Inpp4b*<sup>-/-</sup>;*Pten*<sup>+/-</sup> mice developed aggressive thyroid tumours resembling human follicular variant papillary thyroid carcinoma (FV-PTC), which was not observed in *Pten*<sup>+/-</sup> mice, leading to reduced survival. Furthermore, *Akt2*<sup>-/-</sup>;*Inpp4b*<sup>-/-</sup>;*Pten*<sup>+/-</sup> mice exhibited no overt FV-PTC phenotype and showed an improved lifespan, whereas *Akt1*<sup>-/-</sup>;*Inpp4b*<sup>-/-</sup>;*Pten*<sup>+/-</sup> were comparable to *Inpp4b*<sup>-/-</sup>;*Pten*<sup>+/-</sup> mice, suggesting that AKT2 drives *Inpp4b/Pten*-deficient thyroid tumorigenicity (Table 2) [126]. Indeed, this suggests that *INPP4B*, like *PTEN*, preferentially regulates AKT2 activation in thyroid tissue in an isoform-dependent signalling model. *INPP4B* but not *PTEN* co-localizes with AKT2 and PIK3C2 $\alpha$  on early endosomes of thyroid cancer cells where *INPP4B* negatively regulates PIK3C2 $\alpha$ -mediated AKT2 signalling through PtdIns(3,4) $P_2$  hydrolysis [134]. An independent report showed that *PTEN* binds to PtdIns3P-positive endocytic vesicles along microtubules where it prevents AKT activation through its action on vesicular PtdIns(3,4,5) $P_3$  hydrolysis [135]. *INPP4B* together with VPS34 was postulated to dynamically regulate PtdIns3P on endocytic vesicles to mediate *PTEN* recruitment and although this has not been shown experimentally, it suggests an endosomal function for *INPP4B* signalling. *INPP4B* can also directly dephosphorylate PtdIns(3,4,5) $P_3$  in *Pten*-null thyroid tissue and concomitant loss of *Inpp4b* and *Pten* promoted a striking increase in PtdIns(3,4,5) $P_3$  levels [126]. This analysis suggests in some contexts that *INPP4B* is a direct regulator of PtdIns(3,4,5) $P_3$ , which is predicted to act as the last line of defence against deleterious PtdIns(3,4,5) $P_3$  accumulation in *PTEN*-deficient thyroid cancer cells.

*INPP4B* can directly degrade PtdIns(3,4) $P_2$  signals by dephosphorylating the inositol head group, yet recent studies suggest that *INPP4B* may in other contexts increase PtdIns(3,4,5) $P_3$  levels [128, 136]. TAPP1/2 proteins bind to PtdIns(3,4) $P_2$  and drive a negative feedback loop that recruits inhibitory PI3K-signalling proteins such as PTPL-1 to decrease PtdIns(3,4,5) $P_3$  production [136,137]. Degradation of PtdIns(3,4) $P_2$  by *INPP4B* was postulated to reduce this TAPP1/2-mediated feedback and thus conversely promote PtdIns(3,4,5) $P_3$  accumulation [136]. *INPP4B* has also been shown to indirectly up-regulate PtdIns(3,4,5) $P_3$  through *PTEN* destabilization. In colon cancer cell lines, *INPP4B* binds and dephosphorylates the C-terminal tail region of *PTEN* leading to *PTEN* degradation and thereby an increase in PtdIns(3,4,5) $P_3$  and subsequently PI3K signalling activation [128]. However, this apparent inhibition of *PTEN* function is in contrast with previous findings, which suggests that non-phosphorylated *PTEN* displays increased lipid phosphatase activity [138,139]. Thus, the consequences of post-translational modifications

by INPP4B on PTEN catalytic activity require further examination. Nonetheless, INPP4B overexpression promoted anchorage-independent cell growth in FHC colon epithelial cells, cell proliferation in SW620 and HT-29 colon cancer cells, and *INPP4B* shRNA knockdown in HTC116 colon cancer cells reduced murine xenograft tumour size [128]. Therefore, despite INPP4B tumour suppressor function being reported *in vivo* and *in vitro* in various cancers, there is emerging evidence that INPP4B also plays a paradoxical oncogenic role in certain other cancer contexts.

The recent emergence of serum and glucocorticoid-regulated kinase (SGK3) as an oncogenic effector in *PIK3CA*-mutant breast cancer cells independent of AKT [140] has led to the examination of INPP4B as a mediator of PI3K/SGK3 signalling. SGK3 is phosphorylated and activated upon binding of its PX domain to endosomal PtdIns3P [141]. Treatment of U2OS cells with class I PI3K inhibitors (GDC-0941 or BKM120) reduced SGK3 phosphorylation up to 40% in a dose-dependent manner, suggesting that SGK3 is regulated downstream of class I PI3Ks [142]. In colon cancer cells, INPP4B-mediated degradation of PTEN promoted tumour growth, proliferation and co-operatively enhanced AKT and SGK3 activation downstream of PI3K (Table 2) [128]. However, as INPP4B generates a membrane-bound pool of PtdIns3P, INPP4B was predicted to trigger SGK3 activation through hydrolysis of plasma membrane-bound PtdIns(3,4)P<sub>2</sub>. Indeed, high INPP4B protein expression in fresh melanoma isolates and melanoma cell lines was associated with high pSGK3<sup>T320</sup> levels [143]. *INPP4B* shRNA knockdown attenuated melanoma cell proliferation and xenograft tumour growth, whereas INPP4B overexpression enhanced cell proliferation and promoted melanocyte anchorage-independent cell growth, driven by INPP4B-mediated activation of SGK3 in an AKT-independent manner (Table 2) [143]. In breast cancer cells, increased SGK3 phosphorylation was associated with increased INPP4B expression, as well as *PIK3CA* and *PTEN* mutations [144]. shRNA knockdown of *INPP4B* in MCF-7 and ZR-75-1 breast cancer cells, which express high levels of SGK3, reduced anchorage-independent cell growth, cell migration, 3D colony formation and mouse xenograft tumour growth as well as inhibiting IGF-1-stimulated SGK3 phosphorylation (Table 2) [144]. Thus in cell lines with high SGK3 expression, INPP4B may provide a molecular gateway to the PI3K/SGK3 signalling axis that diverges from the canonical PI3K/AKT signalling pathway. SGK3 co-localizes with EEA1 at early endosomes and does not exhibit a plasma membrane distribution [142]. Given that INPP4B localises to early endosomes in thyroid cancer cells, these findings provide further evidence of a potential endosomal function for INPP4B in particular cancers.

The complexity of INPP4B function is also highlighted in AML. Several studies have demonstrated increased INPP4B expression, which leads to chemotherapeutic resistance and poor patient outcomes [145–147]. Increased INPP4B expression was observed in a subset of AML cases associated with reduced therapeutic response, shorter event free and overall survival and was an independent biomarker of patient prognosis [145,146]. Induction of INPP4B in AML cells promoted cell proliferation, survival and desensitization to chemotherapeutic treatment *in vivo* and *in vitro* [145,146]. Conversely, siRNA knockdown of *INPP4B* sensitized AML cells to chemotherapeutic treatment, by inhibiting the activation of several DNA repair proteins including ATM and BRCA1 [147]. However, ectopic expression of a catalytically inactive INPP4B mutant yielded contrasting effects on the therapeutic response. Dzieladze et al. [146] identified a phosphatase-dependent function for INPP4B in mediating drug response, whereby loss of phosphatase activity ablated the reduced sensitivity to daunorubicin observed with wild-type INPP4B expression. In contrast, Rijal et al. [145] reported that catalytically inactive-INPP4B expression recapitulated the chemoresistant phenotype, suggesting a phosphatase-independent function of INPP4B in cancer. INPP4B expression was not associated with changes in AKT phosphorylation in primary AML samples or in cell lines, further suggesting an AKT-independent function for INPP4B. INPP4B may have more diverse molecular functions beyond its role as a lipid and protein phosphatase, and examination of potential protein–protein interactions may further elucidate its complex and dynamic role in cancer signalling.

INPP4B expression is altered in human cancers and the phosphatase appears to play both oncogenic and tumour suppressor roles depending on whether expression is increased or decreased. These studies suggest a thorough examination of the molecular functions of the inositol polyphosphate phosphatases in different cancers may reveal novel roles beyond their canonical tumour suppressor roles as negative regulators of PI3K/AKT signalling.

## Regulation of phosphoinositide phosphatases by miRNAs

Reduced expression of PI3K pathway enzymes such as PTEN, PIP2 and INPP4B is frequently observed in human cancers, which may be due to loss of chromosomal regions, mRNA or protein expression. Small non-coding miRNAs are critical regulators of gene expression including many PI3K pathway members and are frequently dysregulated in human cancers. miRNAs down-regulate mRNA transcripts by binding to the 3'-UTR and promoting

degradation of the target mRNA and regulate the majority of the transcriptome. Down-regulation of protein phosphatases PP2A and PHLPP is mediated by miRNAs. *miR222* targets the *PPP2R2A* subunit of PP2A in HCC to disrupt cell motility and *miR-190* inhibits *PHLPP* expression and promotes carcinogenic transformation of bronchial cells suggesting that the AKT pathway is a prominent target of miRNA activity [148,149]. In addition, expression of phosphoinositide phosphatases such as PTEN, PIPP and INPP4B is modulated by miRNAs. In human cancers, *PTEN* is frequently targeted by miRNAs such as *miR21*, *miR22*, *miRN214* and *miR221* [150]. *miR21* promotes *PTEN*-transcript degradation and enhances tumour growth, and is frequently up-regulated in colorectal, ovarian and triple negative breast cancers [151-153]. On the other hand, genomic loss of *miR-494* or *miR-599* promotes increased *INPP4B* expression in melanoma cells, and introduction of antisense-miRNA oligonucleotides targeted to *miR494* or *miR599* promotes melanoma cell proliferation through up-regulation of INPP4B [143]. However, miRNA-mediated down-regulation of multiple phosphoinositide phosphatases such as PIPP and PTEN may be characteristic of some cancer cells. Expression of *miR-3127* and *miR-508* is frequently increased in some human cancers suppressing expression of *PIPP* as well as other PI3K/AKT signalling pathway components including *PTEN*, *INPP4A* and *PHLPP1/2* [154,155]. Exogenous expression of *miR-508* increased and inhibition decreased cell proliferation, colony formation and anchorage-independent cell growth of oesophageal squamous cell carcinoma (ESCC) cells [155]. Similarly, up-regulation of *miR-3127* resulted in increased anchorage-independent cell growth in HCC cells [154]. The ability of single miRNAs to regulate the expression of multiple phosphoinositide phosphatases may have cumulative effects on PI3K/AKT signalling, and given miRNA-targeted therapies are emerging in clinical development it may also provide a more robust treatment strategy with the ability to alter expression of multiple phosphatases simultaneously.

## Conclusions

The inositol polyphosphate phosphatases are dysregulated in many human cancers, and although they were originally predicted to be negative regulators of canonical PI3K/AKT signalling, recent studies suggest they may play more complex roles in tumorigenesis [128, 143, 144, 145, 146]. The spatio-temporal regulation of phosphoinositide pools by the phosphatases creates dynamic signalling gradients that are critical for the maintenance of signalling homeostasis and when disrupted may lead to cellular transformation. Ablation of these phosphatases can drive oncogenic PI3K signalling through distinct AKT isoform-dominant effectors, leading to diverse phenotypic outcomes. The relative expression levels of AKT1 compared with AKT2 may mediate this distinction, where AKT1 is the primary effector in response to phosphatase ablation except in tissues such as the thyroid where AKT2 is more highly expressed. However, AKT2-addicted phenotypes observed in *PTEN*-depleted cancer cells suggest that alternate regulatory mechanisms may be at play. AKT isoforms have distinct subcellular localizations and thus it is conceivable that compartmentalization of the lipid phosphatases with enriched pools of distinct AKT isoforms may contribute to their downstream function. The activation states of AKT isoforms may also contribute to this divergence, and the activity of the various AKT kinases and phosphatases together with the phosphoinositide phosphatases may affect the activation and function of the AKT isoforms.

Further investigation of phosphatase-independent functions and the cumulative effects of multiple phosphatase dysregulation within the same cancers may also help define the highly dynamic and complex roles these phosphatases play in tumorigenesis and enable determination of whether PI3K and/or AKT inhibitor treatments, or alternative approaches will be effective therapeutic cancer strategies. The PI3K $\delta$ -inhibitor idelalisib is approved for patient use in chronic lymphocytic leukaemia, small lymphocytic lymphoma and follicular lymphoma, and several other PI3K inhibitors are undergoing phase II-III trials [156]. However, clinical trials with AKT inhibitors have shown limited clinical success, and miltefosine is currently the only approved therapy as a topical treatment for cutaneous breast cancer [157]. AKT remains a problematic therapeutic target given the sequence homology among isoforms especially in the kinase domain, but also its structural similarity to other kinase families such as the AGC kinases. Additionally, given the opposing functions of AKT isoforms in some cancers, inhibition of pan-AKT has the potential for undesired physiological consequences on tumour growth and metastasis in cancers such as glioma, breast cancer and vascular tumours. It is therefore possible that AKT isoform-specific inhibitors, perhaps targeted to the more unique regulatory or PH domains, may prove a more viable therapeutic strategy especially in patients with phosphatase dysregulation. Given the distinct functional roles of the inositol polyphosphate phosphatases on AKT isoform signalling and the potential oncogenic effects of phosphatases such as INPP4B, examination of the lipid phosphatase signalling networks dysregulated in specific cancers may identify novel drug targets or therapeutic approaches.

## Competing interests

The authors declare that there are no competing interests associated with the manuscript.

## Funding

This work was supported by the National Health and Medical Research Council [grant number APP1061344].

## Abbreviations

AML, acute myeloid leukaemia; DNA-PK, DNA-dependent protein kinase; EEA1, early endosome antigen 1; EGFR, epidermal growth factor receptor; ER, oestrogen receptor; FOXO, forkhead box O; FV-PTC, follicular variant papillary thyroid carcinoma; GPCR, G-protein-coupled receptor; GSK3 $\beta$ , glycogen synthase kinase 3 beta; HCC, hepatocellular carcinoma; HDAC2, histone deacetylase 2; IGF-1, insulin-like growth factor 1; ILK, integrin-linked kinase; INPP4B, inositol polyphosphate 4-phosphatase type II; INPP5J, inositol polyphosphate 5-phosphatase J; Ins(3,4)P<sub>2</sub>, inositol-3,4-bisphosphate; LOH, loss of heterozygosity; MMTV, mouse mammary tumour virus; mTORC, mammalian target of rapamycin complex; NFAT, nuclear factor of activated T cells; PDFGB, platelet-derived growth factor subunit B; PDK1, phosphoinositide-dependent kinase 1; PH, pleckstrin homology; PHLPP, PH domain and leucine-rich repeat protein phosphatase; PI3K, phosphoinositide 3-kinase; PIPP, proline-rich inositol polyphosphate 5-phosphatase; PP2A, protein phosphatase 2; PRAS40, proline-rich AKT substrate of 40 kDa; PtdIns3P, phosphatidylinositol 3-phosphate; PtdIns(3,4)P<sub>2</sub>, phosphatidylinositol 3,4-bisphosphate; PtdIns(3,4,5)P<sub>3</sub>, phosphatidylinositol 3,4,5-trisphosphate; PtdIns(4,5)P<sub>2</sub>, phosphatidylinositol 4,5-bisphosphate; PTEN, phosphatase and tensin homologue; PyMT, polyoma virus middle T antigen; RCAS-TVA, replication-competent avian sarcoma-leukosis virus long terminal repeat with splice acceptor tumour virus A; RTK, receptor tyrosine kinase; SGK3, serum and glucocorticoid-regulated kinase; SKICH, SKIP carboxyl homology.

## References

- 1 Samuels, Y., Wang, Z., Bardelli, A., Silliman, N., Ptak, J., Szabo, S. et al. (2004) High frequency of mutations of the PIK3CA gene in human cancers. *Science* **304**, 554
- 2 Yuan, T.L. and Cantley, L.C. (2008) PI3K pathway alterations in cancer: variations on a theme. *Oncogene* **27**, 5497–5510
- 3 James, S.R., Downes, C.P., Gigg, R., Grove, S.J., Holmes, A.B. and Alessi, D.R. (1996) Specific binding of the Akt-1 protein kinase to phosphatidylinositol 3,4,5-trisphosphate without subsequent activation. *Biochem. J.* **315**, 709–713
- 4 Ma, K., Cheung, S.M., Marshall, A.J. and Duronio, V. (2008) PI(3,4,5)P<sub>3</sub> and PI(3,4)P<sub>2</sub> levels correlate with PKB/akt phosphorylation at Thr308 and Ser473, respectively; PI(3,4)P<sub>2</sub> levels determine PKB activity. *Cell. Signal.* **20**, 684–694
- 5 Sarbassov, D.D., Guertin, D.A., Ali, S.M. and Sabatini, D.M. (2005) Phosphorylation and regulation of Akt/PKB by the rictor-mTOR complex. *Science* **307**, 1098–1101
- 6 Alessi, D.R., James, S.R., Downes, C.P., Holmes, A.B., Gaffney, P.R., Reese, C.B. et al. (1997) Characterization of a 3-phosphoinositide-dependent protein kinase which phosphorylates and activates protein kinase B $\alpha$ . *Curr. Biol.* **7**, 261–269
- 7 Eramo, M.J. and Mitchell, C.A. (2016) Regulation of PtdIns(3,4,5)P<sub>3</sub>/Akt signalling by inositol polyphosphate 5-phosphatases. *Biochem. Soc. Trans.* **44**, 240–252
- 8 Rynkiewicz, N.K., Liu, H.J., Balamatsias, D. and Mitchell, C.A. (2012) INPP4A/INPP4B and P-Rex proteins: related but different? *Adv. Biol. Regul.* **52**, 265–279
- 9 Yang, Z.Z., Tschopp, O., Hemmings-Mieszczak, M., Feng, J., Brodbeck, D., Perentes, E. et al. (2003) Protein kinase B  $\alpha$ /Akt1 regulates placental development and fetal growth. *J. Biol. Chem.* **278**, 32124–32131
- 10 Chen, W.S., Xu, P.-Z., Gottlob, K., Chen, M.-L., Sokol, K., Shiyanova, T. et al. (2001) Growth retardation and increased apoptosis in mice with homozygous disruption of the akt1 gene. *Genes Dev.* **15**, 2203–2208
- 11 Cho, H., Thorvaldsen, J.L., Chu, Q., Feng, F. and Birnbaum, M.J. (2001) Akt1/PKB $\alpha$  is required for normal growth but dispensable for maintenance of glucose homeostasis in mice. *J. Biol. Chem.* **276**, 38349–38352
- 12 Cho, H., Mu, J., Kim, J.K., Thorvaldsen, J.L., Chu, Q., Crenshaw, III, E.B. et al. (2001) Insulin resistance and a diabetes mellitus-like syndrome in mice lacking the protein kinase Akt2 (PKB  $\beta$ ). *Science* **292**, 1728–1731
- 13 Garofalo, R.S., Orena, S.J., Rafidi, K., Torchia, A.J., Stock, J.L., Hildebrandt, A.L. et al. (2003) Severe diabetes, age-dependent loss of adipose tissue, and mild growth deficiency in mice lacking Akt2/PKB  $\beta$ . *J. Clin. Invest.* **112**, 197–208
- 14 Tschopp, O., Yang, Z.Z., Brodbeck, D., Dummler, B.A., Hemmings-Mieszczak, M., Watanabe, T. et al. (2005) Essential role of protein kinase B  $\gamma$  (PKB  $\gamma$ /Akt3) in postnatal brain development but not in glucose homeostasis. *Development* **132**, 2943–2954
- 15 Easton, R.M., Cho, H., Roovers, K., Shineman, D.W., Mizrahi, M., Forman, M.S. et al. (2005) Role for Akt3/protein kinase B $\gamma$  in attainment of normal brain size. *Mol. Cell. Biol.* **25**, 1869–1878
- 16 Choi, S., Hedman, A.C., Sayedyahosseini, S., Thapa, N., Sacks, D.B. and Anderson, R.A. (2016) Agonist-stimulated phosphatidylinositol-3,4,5-trisphosphate generation by scaffolded phosphoinositide kinases. *Nat. Cell Biol.* **18**, 1324–1335
- 17 Stronach, E.A., Chen, M., Maginn, E.N., Agarwal, R., Mills, G.B., Wasan, H. et al. (2011) DNA-PK mediates AKT activation and apoptosis inhibition in clinically acquired platinum resistance. *Neoplasia* **13**, 1069–1080
- 18 Tsuchiya, A., Kanno, T. and Nishizaki, T. (2014) PI3 kinase directly phosphorylates Akt1/2 at Ser473/474 in the insulin signal transduction pathway. *J. Endocrinol.* **220**, 49–59

- 19 McDonald, P.C., Oloumi, A., Mills, J., Dobрева, I., Maidan, M., Gray, V. et al. (2008) Rictor and integrin-linked kinase interact and regulate Akt phosphorylation and cancer cell survival. *Cancer Res.* **68**, 1618–1624
- 20 Lee, S.L., Chou, C.C., Chuang, H.C., Hsu, E.C., Chiu, P.C., Kulp, S.K. et al. (2013) Functional role of mTORC2 versus integrin-linked kinase in mediating Ser473-Akt phosphorylation in PTEN-negative prostate and breast cancer cell lines. *PLoS ONE* **8**, e67149
- 21 Clark, A.R. and Toker, A. (2014) Signalling specificity in the Akt pathway in breast cancer. *Biochem. Soc. Trans.* **42**, 1349–1355
- 22 Yoeli-Lerner, M., Yiu, G.K., Rabinovitz, I., Erhardt, P., Jauliac, S. and Toker, A. (2005) Akt blocks breast cancer cell motility and invasion through the transcription factor NFAT. *Mol. Cell* **20**, 539–550
- 23 Arboleda, M.J., Lyons, J.F., Kabbinar, F.F., Bray, M.R., Snow, B.E., Ayala, R. et al. (2003) Overexpression of AKT2/protein kinase Bbeta leads to up-regulation of beta1 integrins, increased invasion, and metastasis of human breast and ovarian cancer cells. *Cancer Res.* **63**, 196–206
- 24 Yi, K.H. and Lauring, J. (2016) Recurrent AKT mutations in human cancers: functional consequences and effects on drug sensitivity. *Oncotarget* **7**, 4241–4251
- 25 Carpten, J.D., Faber, A.L., Horn, C., Donoho, G.P., Briggs, S.L., Robbins, C.M. et al. (2007) A transforming mutation in the pleckstrin homology domain of AKT1 in cancer. *Nature* **448**, 439–444
- 26 Rudolph, M., Anzeneder, T., Schulz, A., Beckmann, G., Byrne, A.T., Jeffers, M. et al. (2016) AKT1 (E17K) mutation profiling in breast cancer: prevalence, concurrent oncogenic alterations, and blood-based detection. *BMC Cancer* **16**, 622
- 27 Stemke-Hale, K., Gonzalez-Angulo, A.M., Lluch, A., Neve, R.M., Kuo, W.L., Davies, M. et al. (2008) An integrative genomic and proteomic analysis of PIK3CA, PTEN, and AKT mutations in breast cancer. *Cancer Res.* **68**, 6084–6091
- 28 Mancini, M.L., Lien, E.C. and Toker, A. (2016) Oncogenic AKT1 (E17K) mutation induces mammary hyperplasia but prevents HER2-driven tumorigenesis. *Oncotarget* **7**, 17301–17313
- 29 Beaver, J.A., Gustin, J.P., Yi, K.H., Rajpurohit, A., Thomas, M., Gilbert, S.F. et al. (2013) PIK3CA and AKT1 mutations have distinct effects on sensitivity to targeted pathway inhibitors in an isogenic luminal breast cancer model system. *Clin. Cancer Res.* **19**, 5413–5422
- 30 Davies, M.A., Stemke-Hale, K., Tellez, C., Calderone, T.L., Deng, W., Prieto, V.G. et al. (2008) A novel AKT3 mutation in melanoma tumours and cell lines. *Br. J. Cancer* **99**, 1265–1268
- 31 Actor, B., Cobbers, J.M., Buschges, R., Wolter, M., Knobbe, C.B., Lichter, P. et al. (2002) Comprehensive analysis of genomic alterations in gliosarcoma and its two tissue components. *Genes Chromosomes Cancer* **34**, 416–427
- 32 Staal, S.P. (1987) Molecular cloning of the akt oncogene and its human homologues AKT1 and AKT2: amplification of AKT1 in a primary human gastric adenocarcinoma. *Proc. Natl. Acad. Sci. U.S.A.* **84**, 5034–5037
- 33 Cheng, J.Q., Ruggeri, B., Klein, W.M., Sonoda, G., Altomare, D.A., Watson, D.K. et al. (1996) Amplification of AKT2 in human pancreatic cells and inhibition of AKT2 expression and tumorigenicity by antisense RNA. *Proc. Natl. Acad. Sci. U.S.A.* **93**, 3636–3641
- 34 Bellacosa, A., de Feo, D., Godwin, A.K., Bell, D.W., Cheng, J.Q., Altomare, D.A. et al. (1995) Molecular alterations of the AKT2 oncogene in ovarian and breast carcinomas. *Int. J. Cancer* **64**, 280–285
- 35 Xu, X., Sakon, M., Nagano, H., Hiraoka, N., Yamamoto, H., Hayashi, N. et al. (2004) Akt2 expression correlates with prognosis of human hepatocellular carcinoma. *Oncol. Rep.* **11**, 25–32
- 36 Roy, H.K., Olusola, B.F., Clemens, D.L., Karolski, W.J., Ratashak, A., Lynch, H.T. et al. (2002) AKT proto-oncogene overexpression is an early event during sporadic colon carcinogenesis. *Carcinogenesis* **23**, 201–205
- 37 Ruggeri, B.A., Huang, L., Wood, M., Cheng, J.Q. and Testa, J.R. (1998) Amplification and overexpression of the AKT2 oncogene in a subset of human pancreatic ductal adenocarcinomas. *Mol. Carcinog.* **21**, 81–86
- 38 Turner, K.M., Sun, Y., Ji, P., Granberg, K.J., Bernard, B., Hu, L. et al. (2015) Genomically amplified Akt3 activates DNA repair pathway and promotes glioma progression. *Proc. Natl. Acad. Sci. U.S.A.* **112**, 3421–3426
- 39 Nakatani, K., Thompson, D.A., Barthel, A., Sakaue, H., Liu, W., Weigel, R.J. et al. (1999) Up-regulation of Akt3 in estrogen receptor-deficient breast cancers and androgen-independent prostate cancer lines. *J. Biol. Chem.* **274**, 21528–21532
- 40 Stahl, J.M., Sharma, A., Cheung, M., Zimmerman, M., Cheng, J.Q., Bosenberg, M.W. et al. (2004) Deregulated Akt3 activity promotes development of malignant melanoma. *Cancer Res.* **64**, 7002–7010
- 41 Lin, H.J., Hsieh, F.C., Song, H. and Lin, J. (2005) Elevated phosphorylation and activation of PDK-1/AKT pathway in human breast cancer. *Br. J. Cancer* **93**, 1372–1381
- 42 Maurer, M., Su, T., Saal, L.H., Koujak, S., Hopkins, B.D., Barkley, C.R. et al. (2009) 3-Phosphoinositide-dependent kinase 1 potentiates upstream lesions on the phosphatidylinositol 3-kinase pathway in breast carcinoma. *Cancer Res.* **69**, 6299–6306
- 43 Kim, L.C., Cook, R.S. and Chen, J. (2016) mTORC1 and mTORC2 in cancer and the tumor microenvironment. *Oncogene*, doi:10.1038/onc.2016.363
- 44 Cheng, H., Zou, Y., Ross, J.S., Wang, K., Liu, X., Halmos, B. et al. (2015) RICTOR amplification defines a novel subset of patients with lung cancer who may benefit from treatment with mTORC1/2 inhibitors. *Cancer Discov.* **5**, 1262–1270
- 45 Morrison Joly, M., Hicks, D.J., Jones, B., Sanchez, V., Estrada, M.V., Young, C. et al. (2016) Rictor/mTORC2 drives progression and therapeutic resistance of HER2-amplified breast cancers. *Cancer Res.* **76**, 4752–4764
- 46 Balko, J.M., Giltman, J.M., Wang, K., Schwarz, L.J., Young, C.D., Cook, R.S. et al. (2014) Molecular profiling of the residual disease of triple-negative breast cancers after neoadjuvant chemotherapy identifies actionable therapeutic targets. *Cancer Discov.* **4**, 232–245
- 47 Liu, P., Gan, W., Chin, Y.R., Ogura, K., Guo, J., Zhang, J. et al. (2015) PtdIns(3,4,5)P3-dependent activation of the mTORC2 kinase complex. *Cancer Discov.* **5**, 1194–1209
- 48 Lange, A., Wickstrom, S.A., Jakobson, M., Zent, R., Sainio, K. and Fassler, R. (2009) Integrin-linked kinase is an adaptor with essential functions during mouse development. *Nature* **461**, 1002–1006

- 49 Liu, P., Begley, M., Michowski, W., Inuzuka, H., Ginzberg, M., Gao, D. et al. (2014) Cell-cycle-regulated activation of Akt kinase by phosphorylation at its carboxyl terminus. *Nature* **508**, 541–545
- 50 Yang, W.L., Wang, J., Chan, C.H., Lee, S.W., Campos, A.D., Lamothe, B. et al. (2009) The E3 ligase TRAF6 regulates Akt ubiquitination and activation. *Science* **325**, 1134–1138
- 51 Lin, C.H., Liu, S.Y. and Lee, E.H. (2016) SUMO modification of Akt regulates global SUMOylation and substrate SUMOylation specificity through Akt phosphorylation of Ubc9 and SUMO1. *Oncogene* **35**, 595–607
- 52 Wang, S., Huang, X., Sun, D., Xin, X., Pan, Q., Peng, S. et al. (2012) Extensive crosstalk between O-GlcNAcylation and phosphorylation regulates Akt signaling. *PLoS ONE* **7**, e37427
- 53 Perrotti, D. and Neviani, P. (2013) Targeting a tumor suppressor to suppress tumor growth: news and views on protein phosphatase 2A (PP2A) as a target for anti-cancer therapy. *Lancet Oncol.* **14**, e229–e238
- 54 Newton, A.C. and Trotman, L.C. (2014) Turning Off AKT: PHLPP as a drug target. *Annu. Rev. Pharmacol. Toxicol.* **54**, 537–558
- 55 Brognard, J., Sierrecki, E., Gao, T. and Newton, A.C. (2007) PHLPP and a second isoform, PHLPP2, differentially attenuate the amplitude of Akt signaling by regulating distinct Akt isoforms. *Mol. Cell* **25**, 917–931
- 56 Nitsche, C., Edderkaoui, M., Moore, R.M., Eibl, G., Kasahara, N., Treger, J. et al. (2012) The phosphatase PHLPP1 regulates Akt2, promotes pancreatic cancer cell death, and inhibits tumor formation. *Gastroenterology* **142**, 377–387.e1–e5
- 57 Goel, A., Arnold, C.N., Niedzwiecki, D., Chang, D.K., Ricciardiello, L., Carethers, J.M. et al. (2003) Characterization of sporadic colon cancer by patterns of genomic instability. *Cancer Res.* **63**, 1608–1614
- 58 Liu, J., Weiss, H.L., Rychahou, P., Jackson, L.N., Evers, B.M. and Gao, T. (2009) Loss of PHLPP expression in colon cancer: role in proliferation and tumorigenesis. *Oncogene* **28**, 994–1004
- 59 Rakha, E.A., Green, A.R., Powe, D.G., Roylance, R. and Ellis, I.O. (2006) Chromosome 16 tumor-suppressor genes in breast cancer. *Genes Chromosomes Cancer* **45**, 527–535
- 60 Topping, N., Borre, M., Sorensen, K.D., Andersen, C.L., Wiuf, C. and Orntoft, T.F. (2007) Genome-wide analysis of allelic imbalance in prostate cancer using the Affymetrix 50K SNP mapping array. *Br. J. Cancer* **96**, 499–506
- 61 Safford, S.D., Goyeau, D., Freerman, A.J., Bentley, R., Everett, M.L., Grundy, P.E. et al. (2003) Fine mapping of Wilms' tumors with 16q loss of heterozygosity localizes the putative tumor suppressor gene to a region of 6.7 megabases. *Ann. Surg. Oncol.* **10**, 136–143
- 62 Patael-Karasik, Y., Daniely, M., Gotlieb, W.H., Ben-Baruch, G., Schiby, J., Barakai, G. et al. (2000) Comparative genomic hybridization in inherited and sporadic ovarian tumors in Israel. *Cancer Genet. Cytogenet.* **121**, 26–32
- 63 Linnerth-Petrik, N.M., Santry, L.A., Petrik, J.J. and Wootton, S.K. (2014) Opposing functions of Akt isoforms in lung tumor initiation and progression. *PLoS ONE* **9**, e94595
- 64 Dillon, R.L., Marcotte, R., Hennessy, B.T., Woodgett, J.R., Mills, G.B. and Muller, W.J. (2009) Akt1 and akt2 play distinct roles in the initiation and metastatic phases of mammary tumor progression. *Cancer Res.* **69**, 5057–5064
- 65 Hutchinson, J.N., Jin, J., Cardiff, R.D., Woodgett, J.R. and Muller, W.J. (2004) Activation of Akt-1 (PKB- $\alpha$ ) can accelerate ErbB-2-mediated mammary tumorigenesis but suppresses tumor invasion. *Cancer Res.* **64**, 3171–3178
- 66 Wang, Q., Yu, W.N., Chen, X., Peng, X.D., Jeon, S.M., Birnbaum Morris, J. et al. (2016) Spontaneous hepatocellular carcinoma after the combined deletion of Akt isoforms. *Cancer Cell* **29**, 523–535
- 67 Chin, Y.R., Yoshida, T., Marusyk, A., Beck, A.H., Polyak, K. and Toker, A. (2014) Targeting AKT3 signaling in triple negative breast cancer. *Cancer Res.* **74**, 964–973
- 68 O'Hurley, G., Daly, E., O'Grady, A., Cummins, R., Quinn, C., Flanagan, L. et al. (2014) Investigation of molecular alterations of AKT-3 in triple-negative breast cancer. *Histopathology* **64**, 660–670
- 69 Stottrup, C., Tsang, T. and Chin, Y.R. (2016) Upregulation of AKT3 confers resistance to the AKT inhibitor MK2206 in breast cancer. *Mol. Cancer Ther.* **15**, 1964–1974
- 70 Lin, H.P., Lin, C.Y., Huo, C., Jan, Y.J., Tseng, J.C., Jiang, S.S. et al. (2015) AKT3 promotes prostate cancer proliferation cells through regulation of Akt, B-Raf, and TSC1/TSC2. *Oncotarget* **6**, 27097–27112
- 71 Endersby, R., Zhu, X., Hay, N., Ellison, D.W. and Baker, S.J. (2011) Nonredundant functions for Akt isoforms in astrocyte growth and gliomagenesis in an orthotopic transplantation model. *Cancer Res.* **71**, 4106–4116
- 72 Joy, A., Kapoor, M., Georges, J., Butler, L., Chang, Y., Li, C. et al. (2016) The role of AKT isoforms in glioblastoma: AKT3 delays tumor progression. *J. Neurooncol.* **130**, 43–52
- 73 Maroulakou, I.G., Oemler, W., Naber, S.P. and Tschlis, P.N. (2007) Akt1 ablation inhibits, whereas Akt2 ablation accelerates, the development of mammary adenocarcinomas in mouse mammary tumor virus (MMTV)-ErbB2/neu and MMTV-polyoma middle T transgenic mice. *Cancer Res.* **67**, 167–177
- 74 Liu, H., Radisky, D.C., Nelson, C.M., Zhang, H., Fata, J.E., Roth, R.A. et al. (2006) Mechanism of Akt1 inhibition of breast cancer cell invasion reveals a protumorigenic role for TSC2. *Proc. Natl. Acad. Sci. U.S.A.* **103**, 4134–4139
- 75 Chin, Y.R. and Toker, A. (2010) The actin-bundling protein palladin is an Akt1-specific substrate that regulates breast cancer cell migration. *Mol. Cell* **38**, 333–344
- 76 Chin, Y.R. and Toker, A. (2010) Akt2 regulates expression of the actin-bundling protein palladin. *FEBS Lett.* **584**, 4769–4774
- 77 Joglekar, M., Elbazanti, W.O., Weitzman, M.D., Lehman, H.L. and van Golen, K.L. (2015) Caveolin-1 mediates inflammatory breast cancer cell invasion via the Akt1 pathway and RhoC GTPase. *J. Cell. Biochem.* **116**, 923–933
- 78 Cariaga-Martinez, A.E., López-Ruiz, P., Nombela-Blanco, M.P., Motiño, O., González-Corpas, A., Rodríguez-Ubreva, J. et al. (2013) Distinct and specific roles of AKT1 and AKT2 in androgen-sensitive and androgen-independent prostate cancer cells. *Cell. Signal.* **25**, 1586–1597

- 79 Cho, J.H., Robinson, J.P., Arave, R.A., Burnett, W.J., Kircher, D.A., Chen, G. et al. (2015) AKT1 activation promotes development of melanoma metastases. *Cell Rep.* **13**, 898–905
- 80 Gargini, R., Cerliani, J.P., Escoll, M., Antón, I.M. and Wandosell, F. (2015) Cancer stem cell-like phenotype and survival are coordinately regulated by Akt/FoxO/bim pathway. *Stem Cells* **33**, 646–660
- 81 Phung, T.L., Du, W., Xue, Q., Ayyaswamy, S., Gerald, D., Antonello, Z. et al. (2015) Akt1 and akt3 exert opposing roles in the regulation of vascular tumor growth. *Cancer Res.* **75**, 40–50
- 82 Garg, R., Benedetti, L.G., Abera, M.B., Wang, H., Abba, M. and Kazanietz, M.G. (2014) Protein kinase C and cancer: what we know and what we do not. *Oncogene* **33**, 5225–5237
- 83 Song, M.S., Salmena, L. and Pandolfi, P.P. (2012) The functions and regulation of the PTEN tumour suppressor. *Nat. Rev. Mol. Cell Biol.* **13**, 283–296
- 84 Hollander, M.C., Blumenthal, G.M. and Dennis, P.A. (2011) PTEN loss in the continuum of common cancers, rare syndromes and mouse models. *Nat. Rev. Cancer* **11**, 289–301
- 85 Liaw, D., Marsh, D.J., Li, J., Dahia, P.L., Wang, S.I., Zheng, Z. et al. (1997) Germline mutations of the PTEN gene in Cowden disease, an inherited breast and thyroid cancer syndrome. *Nat. Genet.* **16**, 64–67
- 86 Di Cristofano, A., Pesce, B., Cordon-Cardo, C. and Pandolfi, P.P. (1998) Pten is essential for embryonic development and tumour suppression. *Nat. Genet.* **19**, 348–355
- 87 Podsypanina, K., Ellenson, L.H., Nemes, A., Gu, J., Tamura, M., Yamada, K.M. et al. (1999) Mutation of Pten/Mmac1 in mice causes neoplasia in multiple organ systems. *Proc. Natl. Acad. Sci. U.S.A.* **96**, 1563–1568
- 88 Suzuki, A., de la Pompa, J.L., Stambolic, V., Elia, A.J., Sasaki, T., del Barco Barrantes, I. et al. (1998) High cancer susceptibility and embryonic lethality associated with mutation of the PTEN tumor suppressor gene in mice. *Curr. Biol.* **8**, 1169–1178
- 89 Maehama, T. and Dixon, J.E. (1998) The tumor suppressor, PTEN/MMAC1, dephosphorylates the lipid second messenger, phosphatidylinositol 3,4,5-trisphosphate. *J. Biol. Chem.* **273**, 13375–13378
- 90 Stambolic, V., Suzuki, A., de la Pompa, J.L., Brothers, G.M., Mirtsos, C., Sasaki, T. et al. (1998) Negative regulation of PKB/Akt-dependent cell survival by the tumor suppressor PTEN. *Cell* **95**, 29–39
- 91 Sun, H., Lesche, R., Li, D.M., Liliental, J., Zhang, H., Gao, J. et al. (1999) PTEN modulates cell cycle progression and cell survival by regulating phosphatidylinositol 3,4,5-trisphosphate and Akt/protein kinase B signaling pathway. *Proc. Natl. Acad. Sci. U.S.A.* **96**, 6199–6204
- 92 Tamura, M., Gu, J., Matsumoto, K., Aota, S., Parsons, R. and Yamada, K.M. (1998) Inhibition of cell migration, spreading, and focal adhesions by tumor suppressor PTEN. *Science* **280**, 1614–1617
- 93 Shi, Y., Wang, J., Chandrapaty, S., Cross, J., Thompson, C., Rosen, N. et al. (2014) PTEN is a protein tyrosine phosphatase for IRS1. *Nat. Struct. Mol. Biol.* **21**, 522–527
- 94 Tibarewal, P., Zilidis, G., Spinelli, L., Schurch, N., Maccario, H., Gray, A. et al. (2012) PTEN protein phosphatase activity correlates with control of gene expression and invasion, a tumor-suppressing phenotype, but not with AKT activity. *Sci. Signal.* **5**, ra18
- 95 Zhang, S., Huang, W.C., Li, P., Guo, H., Poh, S.B., Brady, S.W. et al. (2011) Combating trastuzumab resistance by targeting SRC, a common node downstream of multiple resistance pathways. *Nat. Med.* **17**, 461–469
- 96 Myers, M.P., Pass, I., Batty, I.H., Van der Kaay, J., Stolarov, J.P., Hemmings, B.A. et al. (1998) The lipid phosphatase activity of PTEN is critical for its tumor suppressor function. *Proc. Natl. Acad. Sci. U.S.A.* **95**, 13513–13518
- 97 Papa, A., Wan, L., Bonora, M., Salmena, L., Song, M.S., Hobbs, R.M. et al. (2014) Cancer-associated PTEN mutants act in a dominant-negative manner to suppress PTEN protein function. *Cell* **157**, 595–610
- 98 Chen, M.L., Xu, P.Z., Peng, X.D., Chen, W.S., Guzman, G., Yang, X. et al. (2006) The deficiency of Akt1 is sufficient to suppress tumor development in Pten<sup>+/-</sup> mice. *Genes Dev.* **20**, 1569–1574
- 99 Xu, P.Z., Chen, M.L., Jeon, S.M., Peng, X.D. and Hay, N. (2012) The effect Akt2 deletion on tumor development in Pten<sup>+/-</sup> mice. *Oncogene* **31**, 518–526
- 100 Chin, Y.R., Yuan, X., Balk, S.P. and Toker, A. (2014) PTEN-deficient tumors depend on AKT2 for maintenance and survival. *Cancer Discov.* **4**, 942–955
- 101 Rychahou, P.G., Kang, J., Gulhati, P., Doan, H.Q., Chen, L.A., Xiao, S.Y. et al. (2008) Akt2 overexpression plays a critical role in the establishment of colorectal cancer metastasis. *Proc. Natl. Acad. Sci. U.S.A.* **105**, 20315–20320
- 102 Ooms, L.M., Fedele, C.G., Astle, M.V., Ivetac, I., Cheung, V., Pearson, R.B. et al. (2006) The inositol polyphosphate 5-phosphatase, PIPP, is a novel regulator of phosphoinositide 3-kinase-dependent neurite elongation. *Mol. Biol. Cell* **17**, 607–622
- 103 Mochizuki, Y. and Takenawa, T. (1999) Novel inositol polyphosphate 5-phosphatase localizes at membrane ruffles. *J. Biol. Chem.* **274**, 36790–36795
- 104 Gurung, R., Tan, A., Ooms, L.M., McGrath, M.J., Huysmans, R.D., Munday, A.D. et al. (2003) Identification of a novel domain in two mammalian inositol-polyphosphate 5-phosphatases that mediates membrane ruffle localization. The inositol 5-phosphatase skip localizes to the endoplasmic reticulum and translocates to membrane ruffles following epidermal growth factor stimulation. *J. Biol. Chem.* **278**, 11376–11385
- 105 Ooms, L.M., Binge, L.C., Davies, E.M., Rahman, P., Conway, J.R., Gurung, R. et al. (2015) The inositol polyphosphate 5-phosphatase PIPP regulates AKT1-dependent breast cancer growth and metastasis. *Cancer Cell* **28**, 155–169
- 106 Denley, A., Gymnopoulos, M., Kang, S., Mitchell, C. and Vogt, P.K. (2009) Requirement of phosphatidylinositol (3,4,5) trisphosphate in phosphatidylinositol 3-kinase-induced oncogenic transformation. *Mol. Cancer Res.* **7**, 1132–1138
- 107 Ye, Y., Jin, L., Wilmott, J.S., Hu, W.L., Yosufi, B., Thorne, R.F. et al. (2013) PI(4,5)P2 5-phosphatase A regulates PI3K/Akt signalling and has a tumour suppressive role in human melanoma. *Nat. Commun.* **4**, 1508
- 108 Irie, H.Y., Pearline, R.V., Grueneberg, D., Hsia, M., Ravichandran, P., Kothari, N. et al. (2005) Distinct roles of Akt1 and Akt2 in regulating cell migration and epithelial-mesenchymal transition. *J. Cell Biol.* **171**, 1023–1034
- 109 Santi, S.A. and Lee, H. (2010) The Akt isoforms are present at distinct subcellular locations. *Am. J. Physiol. Cell Physiol.* **298**, C580–C591



- 110 Takahashi, H., Masuda, K., Ando, T., Kobayashi, T. and Honda, H. (2004) Prognostic predictor with multiple fuzzy neural models using expression profiles from DNA microarray for metastases of breast cancer. *J. Biosci. Bioeng.* **98**, 193–199
- 111 Ellsworth, R.E., Ellsworth, D.L., Lubert, S.M., Hooke, J., Somiari, R.I. and Shriver, C.D. (2003) High-throughput loss of heterozygosity mapping in 26 commonly deleted regions in breast cancer. *Cancer Epidemiol. Biomarkers Prev.* **12**, 915–919
- 112 Iida, A., Kurose, K., Isobe, R., Akiyama, F., Sakamoto, G., Yoshimoto, M. et al. (1998) Mapping of a new target region of allelic loss to a 2-cM interval at 22q13.1 in primary breast cancer. *Genes Chromosomes Cancer* **21**, 108–112
- 113 Osborne, R.J. and Hamshire, M.G. (2000) A genome-wide map showing common regions of loss of heterozygosity/allelic imbalance in breast cancer. *Cancer Res.* **60**, 3706–3712
- 114 van't Veer, L.J., Dai, H., van de Vijver, M.J., He, Y.D., Hart, A.A., Mao, M. et al. (2002) Gene expression profiling predicts clinical outcome of breast cancer. *Nature* **415**, 530–536
- 115 YE, Y., Li, Q., Ge, Y.-M., Zhang, X.-D. and Zhang, L.-J. (2014) The effects of PIB5PA on migration and invasion of human melanoma cells. *Tumor* **34**, 487–493
- 116 Grabinski, N., Bartkowiak, K., Grupp, K., Brandt, B., Pantel, K. and Jucker, M. (2011) Distinct functional roles of Akt isoforms for proliferation, survival, migration and EGF-mediated signalling in lung cancer derived disseminated tumor cells. *Cell. Signal.* **23**, 1952–1960
- 117 Meng, Q., Xia, C., Fang, J., Rojanasakul, Y. and Jiang, B.H. (2006) Role of PI3K and AKT specific isoforms in ovarian cancer cell migration, invasion and proliferation through the p70S6K1 pathway. *Cell. Signal.* **18**, 2262–2271
- 118 Girouard, J., Lafleur, M.J., Parent, S., Leblanc, V. and Asselin, E. (2013) Involvement of Akt isoforms in chemoresistance of endometrial carcinoma cells. *Gynecol. Oncol.* **128**, 335–343
- 119 Tanno, S., Tanno, S., Mitsuuchi, Y., Altomare, D.A., Xiao, G.H. and Testa, J.R. (2001) AKT activation up-regulates insulin-like growth factor I receptor expression and promotes invasiveness of human pancreatic cancer cells. *Cancer Res.* **61**, 589–593
- 120 Kim, D., Kim, S., Koh, H., Yoon, S.O., Chung, A.S., Cho, K.S. et al. (2001) Akt/PKB promotes cancer cell invasion via increased motility and metalloproteinase production. *FASEB J.* **15**, 1953–1962
- 121 Gewinner, C., Wang, Z.C., Richardson, A., Teruya-Feldstein, J., Etamadmoghadam, D., Bowtell, D. et al. (2009) Evidence that inositol polyphosphate 4-phosphatase type II is a tumor suppressor that inhibits PI3K signaling. *Cancer Cell* **16**, 115–125
- 122 Ferron, M. and Vacher, J. (2006) Characterization of the murine Inpp4b gene and identification of a novel isoform. *Gene* **376**, 152–161
- 123 Norris, F.A., Atkins, R.C. and Majerus, P.W. (1997) The cDNA cloning and characterization of inositol polyphosphate 4-phosphatase type II. Evidence for conserved alternative splicing in the 4-phosphatase family. *J. Biol. Chem.* **272**, 23859–23864
- 124 Norris, F.A. and Majerus, P.W. (1994) Hydrolysis of phosphatidylinositol 3,4-bisphosphate by inositol polyphosphate 4-phosphatase isolated by affinity elution chromatography. *J. Biol. Chem.* **269**, 8716–8720
- 125 Ferron, M., Boudiffa, M., Arsenault, M., Rached, M., Pata, M., Giroux, S. et al. (2011) Inositol polyphosphate 4-phosphatase B as a regulator of bone mass in mice and humans. *Cell Metab.* **14**, 466–477
- 126 Kofuji, S., Kimura, H., Nakanishi, H., Nanjo, H., Takasuga, S., Liu, H. et al. (2015) INPP4B is a PtdIns(3,4,5)P3 phosphatase that can act as a tumor suppressor. *Cancer Discov.* **5**, 730–739
- 127 Lopez, S.M., Hodgson, M.C., Packianathan, C., Bingol-Ozakupinar, O., Uras, F., Rosen, B.P. et al. (2013) Determinants of the tumor suppressor INPP4B protein and lipid phosphatase activities. *Biochem. Biophys. Res. Commun.* **440**, 277–282
- 128 Guo, S.T., Chi, M.N., Yang, R.H., Guo, X.Y., Zan, L.K., Wang, C.Y. et al. (2016) INPP4B is an oncogenic regulator in human colon cancer. *Oncogene* **35**, 3049–3061
- 129 Fedele, C.G., Ooms, L.M., Ho, M., Vieuxseux, J., O'Toole, S.A., Millar, E.K. et al. (2010) Inositol polyphosphate 4-phosphatase II regulates PI3K/Akt signaling and is lost in human basal-like breast cancers. *Proc. Natl. Acad. Sci. U.S.A.* **107**, 22231–22236
- 130 Hodgson, M.C., Shao, L.J., Frolov, A., Li, R., Peterson, L.E., Ayala, G. et al. (2011) Decreased expression and androgen regulation of the tumor suppressor gene INPP4B in prostate cancer. *Cancer Res.* **71**, 572–582
- 131 Rynkiewicz, N.K., Fedele, C.G., Chiam, K., Gupta, R., Kench, J.G., Ooms, L.M. et al. (2015) INPP4B is highly expressed in prostate intermediate cells and its loss of expression in prostate carcinoma predicts for recurrence and poor long term survival. *Prostate* **75**, 92–102
- 132 Hodgson, M.C., Deryugina, E.I., Suarez, E., Lopez, S.M., Lin, D., Xue, H. et al. (2014) INPP4B suppresses prostate cancer cell invasion. *Cell Commun. Signal.* **12**, 61
- 133 Perez-Lorenzo, R., Gill, K.Z., Shen, C.H., Zhao, F.X., Zheng, B., Schulze, H.J. et al. (2014) A tumor suppressor function for the lipid phosphatase INPP4B in melanocytic neoplasms. *J. Invest. Dermatol.* **134**, 1359–1368
- 134 Li Chew, C., Lunardi, A., Gulluni, F., Ruan, D.T., Chen, M., Salmena, L. et al. (2015) *In vivo* role of INPP4B in tumor and metastasis suppression through regulation of PI3K-AKT signaling at endosomes. *Cancer Discov.* **5**, 740–751
- 135 Naguib, A., Bencze, G., Cho, H., Zheng, W., Tocilj, A., Elkayam, E. et al. (2015) PTEN functions by recruitment to cytoplasmic vesicles. *Mol. Cell* **58**, 255–268
- 136 Wullschlegel, S., Wasserman, D.H., Gray, A., Sakamoto, K. and Alessi, D.R. (2011) Role of TAPP1 and TAPP2 adaptor binding to PtdIns(3,4)P2 in regulating insulin sensitivity defined by knock-in analysis. *Biochem. J.* **434**, 265–274
- 137 Kimber, W.A., Deak, M., Prescott, A.R. and Alessi, D.R. (2003) Interaction of the protein tyrosine phosphatase PTPL1 with the PtdIns(3,4)P2-binding adaptor protein TAPP1. *Biochem. J.* **376**, 525–535
- 138 Vazquez, F., Ramaswamy, S., Nakamura, N. and Sellers, W.R. (2000) Phosphorylation of the PTEN tail regulates protein stability and function. *Mol. Cell. Biol.* **20**, 5010–5018
- 139 Vazquez, F., Matsuoka, S., Sellers, W.R., Yanagida, T., Ueda, M. and Devreotes, P.N. (2006) Tumor suppressor PTEN acts through dynamic interaction with the plasma membrane. *Proc. Natl. Acad. Sci. U.S.A.* **103**, 3633–3638

- 140 Vasudevan, K.M., Barbie, D.A., Davies, M.A., Rabinovsky, R., McNear, C.J., Kim, J.J. et al. (2009) AKT-independent signaling downstream of oncogenic PIK3CA mutations in human cancer. *Cancer Cell* **16**, 21–32
- 141 Tessier, M. and Woodgett, J.R. (2006) Role of the Phox homology domain and phosphorylation in activation of serum and glucocorticoid-regulated kinase-3. *J. Biol. Chem.* **281**, 23978–23989
- 142 Bago, R., Malik, N., Munson, M.J., Prescott, A.R., Davies, P., Sommer, E. et al. (2014) Characterization of VPS34-IN1, a selective inhibitor of Vps34, reveals that the phosphatidylinositol 3-phosphate-binding SGK3 protein kinase is a downstream target of class III phosphoinositide 3-kinase. *Biochem. J.* **463**, 413–427
- 143 Chi, M.N., Guo, S.T., Wilmott, J.S., Guo, X.Y., Yan, X.G., Wang, C.Y. et al. (2015) INPP4B is upregulated and functions as an oncogenic driver through SGK3 in a subset of melanomas. *Oncotarget* **6**, 39891–38907
- 144 Gasser, J.A., Inuzuka, H., Lau, A.W., Wei, W., Beroukhim, R. and Toker, A. (2014) SGK3 mediates INPP4B-dependent PI3K signaling in breast cancer. *Mol. Cell* **56**, 595–607
- 145 Rijal, S., Fleming, S., Cummings, N., Rynkiewicz, N.K., Ooms, L.M., Nguyen, N.Y. et al. (2015) Inositol polyphosphate 4-phosphatase II (INPP4B) is associated with chemoresistance and poor outcome in AML. *Blood* **125**, 2815–2824
- 146 Dzeladze, I., He, R., Woolley, J.F., Son, M.H., Sharobim, M.H., Greenberg, S.A. et al. (2015) INPP4B overexpression is associated with poor clinical outcome and therapy resistance in acute myeloid leukemia. *Leukemia* **29**, 1485–1495
- 147 Wang, P., Ma, D., Wang, J., Fang, Q., Gao, R., Wu, W. et al. (2016) INPP4B-mediated DNA repair pathway confers resistance to chemotherapy in acute myeloid leukemia. *Tumour Biol.* **37**, 12513–12523
- 148 Wong, Q.W., Ching, A.K., Chan, A.W., Choy, K.W., To, K.F., Lai, P.B. et al. (2010) MiR-222 overexpression confers cell migratory advantages in hepatocellular carcinoma through enhancing AKT signaling. *Clin. Cancer Res.* **16**, 867–875
- 149 Beezhold, K., Liu, J., Kan, H., Meighan, T., Castranova, V., Shi, X. et al. (2011) miR-190-mediated downregulation of PHLPP contributes to arsenic-induced Akt activation and carcinogenesis. *Toxicol. Sci.* **123**, 411–420
- 150 Bermúdez Brito, M., Goulielmaki, E. and Papakonstanti, E.A. (2015) Focus on PTEN regulation. *Front. Oncol.* **5**, 166
- 151 Xiong, Y., Zhang, Y.Y., Wu, Y.Y., Wang, X.D., Wan, L.H., Li, L. et al. (2014) Correlation of over-expressions of miR-21 and Notch-1 in human colorectal cancer with clinical stages. *Life Sci.* **106**, 19–24
- 152 Lou, Y., Yang, X., Wang, F., Cui, Z. and Huang, Y. (2010) MicroRNA-21 promotes the cell proliferation, invasion and migration abilities in ovarian epithelial carcinomas through inhibiting the expression of PTEN protein. *Int. J. Mol. Med.* **26**, 819–827
- 153 Dong, G., Liang, X., Wang, D., Gao, H., Wang, L., Wang, L. et al. (2014) High expression of miR-21 in triple-negative breast cancers was correlated with a poor prognosis and promoted tumor cell *in vitro* proliferation. *Med. Oncol.* **31**, 57
- 154 Jiang, J., Zhang, Y., Guo, Y., Yu, C., Chen, M., Li, Z. et al. (2015) MicroRNA-3127 promotes cell proliferation and tumorigenicity in hepatocellular carcinoma by disrupting of PI3K/AKT negative regulation. *Oncotarget* **6**, 6359–6372
- 155 Lin, C., Liu, A., Zhu, J., Zhang, X., Wu, G., Ren, P. et al. (2014) miR-508 sustains phosphoinositide signalling and promotes aggressive phenotype of oesophageal squamous cell carcinoma. *Nat. Commun.* **5**, 4620
- 156 Yang, Q., Modi, P., Newcomb, T., Queva, C. and Gandhi, V. (2015) Idelalisib: first-in-class PI3K  $\delta$  inhibitor for the treatment of chronic lymphocytic leukemia, small lymphocytic leukemia, and follicular lymphoma. *Clin. Cancer Res.* **21**, 1537–1542
- 157 Nituлесcu, G.M., Margina, D., Juzenas, P., Peng, Q., Oлару, O.T., Saloustros, E. et al. (2016) Akt inhibitors in cancer treatment: the long journey from drug discovery to clinical use (Review). *Int. J. Oncol.* **48**, 869–885
